1 **Organic Dust Exposure Induces Stress Response and Mitochondrial Dysfunction in**  
2 **Monocytic Cells**

3 **Authors**

4 Sanjana Mahadev-Bhat <sup>1</sup>, Denusha Shrestha <sup>1</sup>, Nyzil Massey <sup>1</sup>, Locke A. Karriker <sup>2</sup>, Anumantha  
5 G. Kanthasamy <sup>1</sup>, Chandrashekhar Charavaryamath <sup>1\*</sup>

6 **Author details**

7 <sup>1</sup> Department of Biomedical Sciences, 2008 Vet Med Building, Iowa State University, Ames, IA,  
8 USA.

9 <sup>2</sup> Department of Veterinary Diagnostic and Production Animal Medicine, 2203 Lloyd Veterinary  
10 Medical Center, Iowa State university, Ames, IA, USA

11 \*To whom correspondence should be addressed: Chandrashekhar Charavaryamath, BVSc,  
12 MVSc, PhD., Assistant Professor, Department of Biomedical Sciences, Iowa State University,  
13 Ames, IA 50011. Telephone: (515) 294-7710; Fax: (515) 294-2315; Email: chandru@iastate.edu

14

15

16

17

18

19

20

21

22

23

24

25

26

27 **Abstract**

28 Exposure to airborne organic dust (OD), rich in microbial pathogen-associated molecular patterns,  
29 has been shown to induce inflammatory responses in the lung resulting in changes in airway  
30 structure and function. A common manifestation in lung inflammation is the occurrence of altered  
31 mitochondrial structure and bioenergetics, consequently regulating mitochondrial ROS (mROS)  
32 and creating a vicious cycle of mitochondrial dysfunction.

33 The role of mitochondrial dysfunction in airway diseases such as COPD and asthma is well  
34 known. However, whether OD exposure induces mitochondrial dysfunction largely remains  
35 unknown. Therefore, in this study, we tested a hypothesis that OD exposure induces  
36 mitochondrial stress using a human monocytic cell line (THP-1). We examined the mechanisms  
37 of organic dust extract (ODE) exposure-induced mitochondrial structural and functional changes  
38 in THP-1 cells.

39 In addition, the effect of co-exposure to ethyl pyruvate (EP), a known anti-inflammatory agent, or  
40 mitoapocynin (MA), a mitochondria targeting NOX2 inhibitor was examined. Transmission  
41 electron microscopy images showed significant changes in cellular and organelle morphology  
42 upon ODE exposure. ODE exposure with and without EP co-treatment increased the mtDNA  
43 leakage into the cytosol. Next, ODE exposure increased the PINK1 and Parkin expression,  
44 cytoplasmic cytochrome c levels and reduced mitochondrial mass and cell viability, indicating  
45 mitophagy. MA treatment was partially protective by decreasing Parkin expression, mtDNA and  
46 cytochrome c release and increasing cell viability.

47 **Keywords:** Organic dust, mitoapocynin, ethyl pyruvate, mitochondrial dysfunction

48

49

50

51

52

53

54

55

## 56 Introduction

57 Industrialized agriculture production systems form the backbone of the farm economy in the USA  
58 with a large number of workforce and a major contribution to the nation's GDP (Charavaryamath  
59 and Singh, 2006; Nordgren and Charavaryamath, 2018; Sethi et al., 2017). Despite the production  
60 efficiency and cheaper price of the food, these industries have occupational hazards in the form  
61 of exposure to many on-site contaminants. Among the contaminants, airborne organic dust (OD)  
62 and gases (mainly hydrogen sulfide, methane and ammonia), viable bacteria, fungal spores and  
63 other microbial products are known to be present ("Respiratory Health Hazards in Agriculture,"  
64 1998). OD comprises of particulate matter (PM) of varying sizes from plant, animal and microbial  
65 sources (Vested et al., 2019). Bacterial lipopolysaccharide (LPS) and peptidoglycan (PGN) are  
66 the major microbial pattern recognition receptors (PAMPs) present in the OD samples. Agriculture  
67 production workers who are exposed to OD report several respiratory symptoms and annual  
68 decline in the lung function (Nordgren and Charavaryamath, 2018; Sethi et al., 2017; Wunschel  
69 and Poole, 2016). Strategies that reduce the levels of dust in the workplace have shown to have  
70 positive health impacts (Senthilselvan et al., 1997).

71 Respiratory symptoms of exposed workers include bronchitis, coughing, sneezing, chest-  
72 tightness, asthma and asthma like symptoms, mucus membrane irritation and other signs.  
73 Persistent exposure to OD has been linked to the development of chronic inflammatory  
74 conditions, such as chronic obstructive pulmonary disease (COPD) and asthma, including lung  
75 tissue damage and decline in lung function (Charavaryamath and Singh, 2006; Wunschel and  
76 Poole, 2016). Despite several research groups using both *in vitro* and *in vivo* models of OD  
77 exposure, precise cellular and molecular mechanisms leading to chronic lung disease remain  
78 largely unknown.

79 In response to this, an understanding of the mechanisms of induction of airway inflammation is  
80 essential as it promotes the development of strategies for the maintenance of lung homeostasis  
81 by preserving the balance between pro-inflammatory and anti-inflammatory responses. Studies  
82 have shown that OD-mediated lung inflammation is typically characterized by airway  
83 hyperresponsiveness (AHR), tissue remodeling, and increased influx of inflammatory cells,  
84 particularly neutrophils and macrophages, in lung tissues (Charavaryamath et al., 2005;  
85 Sahlander et al., 2012; Sethi et al., 2017). In previous studies we have shown exposure of human  
86 bronchial epithelial cells to OD results in the production of reactive oxygen species (ROS),  
87 reactive nitrogen species (RNS) and a myriad of pro-inflammatory cytokines such as interleukins  
88 IL-1B, IL-6, and IL-8 (Bhat et al., 2019; Nath Neerukonda et al., 2018). Based on evidence, it is

89 also becoming increasingly clear that, in addition to the above factors, abnormal mitochondrial  
90 signatures and mitochondrial dysfunction contribute to the pathological mechanisms of lung  
91 disease (Cloonan and Choi, 2016). Several *in vitro* and *in vivo* studies have demonstrated the  
92 elevation of key enzymes involved in the production of ROS and RNS due to mitochondrial  
93 impairment in various inflammatory conditions (Cloonan and Choi, 2012; Eisner et al., 2018;  
94 Zhang et al., 2010). Collectively, these findings suggest that targeting multiple pathogenic  
95 mechanisms, including mitochondrial impairment, oxidative stress, and other inflammatory  
96 processes, could provide an advantage over targeting a single disease pathway.

97 Mitochondria are dynamic double membraned organelles that possess their own genome and  
98 proteome. These are ubiquitously present and are critical for many of the body's "housekeeping"  
99 functions, including synthesis and catabolism of metabolites, calcium regulation, and most  
100 importantly generation of ATP by oxidative phosphorylation (OXPHOS) (Tilokani et al., 2018).  
101 Whilst the participation of mitochondria in OXPHOS, stress responses and programmed cell death  
102 pathways have been well studied over the past decade, the role of mitochondria in the activation  
103 and control of the immune response has been of interest. During inflammation, mitochondria can  
104 become damaged or dysfunctional leading to impaired cellular respiration and cell death. The  
105 presence of dysfunctional mitochondria can lead to oxidative stress which acts as a potent  
106 stimulus for exacerbating inflammation (Cloonan and Choi, 2012; Eisner et al., 2018).

107 The adverse effects of inflammation on mitochondria can be abrogated by several mechanisms.  
108 These include the induction of anti-inflammatory responses and antioxidant defenses,  
109 maintenance of mitochondrial integrity through the selective removal of dysfunctional  
110 mitochondria (mitophagy), and the generation of new organelles to replace them (mitochondrial  
111 biogenesis) (Eisner et al., 2018). However, the integration of these compensatory responses, and  
112 the interaction between mitochondria and host cells following OD exposure, are not well  
113 understood. In order to study these processes, we assessed mitochondrial functions, biogenesis,  
114 and mitophagy on exposure to OD alone and in the presence of antioxidant therapies, such as  
115 ethyl pyruvate (EP) and mitoapocynin (MA), which have previously been shown to have significant  
116 antioxidative functions.

117 The protective effects of EP have been attributed to its anti-inflammatory, antioxidative and  
118 antiapoptotic action. Previously we have shown the effectiveness of ethyl pyruvate (EP) as a non-  
119 specific inhibitor of inflammatory cytokine-like high mobility group box 1 (HMGB1) release into the  
120 extracellular space in bronchial epithelial cells (Bhat et al., 2019). We also demonstrated that EP  
121 downregulates reactive oxygen species (ROS) generation and augmented IL-10 production thus

122 promoting anti-inflammatory effects. Similar results have been shown in LPS injected and  
123 ischemic animal models (Venkataraman et al., 2002; Yu et al., 2005). The anti-inflammatory  
124 property of EP has been attributed to the inhibition of ROS-dependent signal transducer and  
125 activator of transcription (STAT) signaling (Kim et al., 2008).

126 In addition to using EP, we also tested the efficacy of MA in a OD-induced inflammatory model.  
127 In previous studies, apocynin, a plant derived antioxidant, has been used as an efficient inhibitor  
128 of NADPH-oxidase complex in many experimental models involving phagocytic and  
129 nonphagocytic cells (Stefanska and Pawliczak, 2008). In this study we used  
130 triphenylphosphonium (TPP) conjugated apocynin (mitoapocynin, MA) designed to enhance their  
131 cellular uptake and target the mitochondria. In contrast to other popular antioxidant therapies, MA  
132 has been shown to attenuate ROS and/or RNS generation in both *in vitro* and *in vivo* models of  
133 neuroinflammation. In an MPTP-induced neuroinflammatory model, MA treatment was shown to  
134 suppress iNOS and various pro-inflammatory cytokines. In addition, MA was shown to inhibit  
135 NOX2 activity and reduce oxidative stress (Ghosh et al., 2016; Langley et al., 2017).

136 In this study we used an immortalized human monocytic cell line (THP1) and tested a hypothesis  
137 that OD-exposure induces mitochondrial stress. We further examined whether there is an  
138 induction of antioxidant defenses, changes in mitophagy and mitochondrial biogenesis in THP1  
139 cells following exposure to OD in the presence of both a mitochondrial specific NOX2 inhibitor  
140 (MA) and an inhibitor of HMGB1 translocation (EP), leading to the maintenance of cellular viability  
141 and mitochondrial integrity. Here we demonstrate that mitochondrial specific or general  
142 antioxidant therapy, through inhibition of HMGB1 translocation, are vital to cellular recovery  
143 following exposure to OD.

## 144 **Materials and Methods**

### 145 *Chemicals and reagents*

146 We purchased RPMI 1640, L- glutamine, penicillin, streptomycin, MitoTracker green, and  
147 MitoSOX Red stains from Invitrogen (ThermoFisher Scientific) and fetal bovine serum (FBS) was  
148 purchased from Atlanta Biologicals. Antibodies for mitofusins (MFN1/2), DRP1, PINK1, Parkin,  
149 OPA1, BNIP3, Cytochrome C, COX4i2, Bcl-2, Bcl-XL, mtTFA, Caspase 1 and Caspase 3 was  
150 purchased from Santa Cruz Biotechnology. The anti-HMGB1 antibody,  $\beta$ -Actin antibody and  
151 Rhod-2AM dye were obtained from Abcam. MitoApocynin-C<sub>11</sub> (MA) was procured from Dr.  
152 Balaraman Kalyanaraman (Medical College of Wisconsin, Milwaukee, WI), stock solution (10 mM  
153 in DMSO) prepared by shaking vigorously and stored at -20°C. MA was used (10  $\mu$ M) as one of

154 the co-treatments. Ethyl pyruvate (EP) purchased from Santa Cruz Biotechnology, was  
155 reconstituted in Ringer's solution (Sigma-Aldrich) and used at a final concentration of 2.5  $\mu$ M in  
156 the cell culture medium.

#### 157 *Organic dust extract preparation*

158 Aqueous organic dust extract (ODE) was collected and prepared as previously described (Bhat  
159 et al., 2019; Romberger et al., 2002). Briefly, settled surface dust samples from swine housing  
160 facilities were collected and 1 g was placed into sterile Hank's Balanced Salt Solution (10 ml;  
161 Gibco). Solution was incubated for one hour at room temperature, centrifuged for 20 min at 1365  
162 x g, and the final supernatant was filter sterilized (0.22  $\mu$ m), a process that also removes coarse  
163 particles. Stock (100%) ODE aliquots frozen at  $-20^{\circ}$ C until use in experiments. The filter sterilized  
164 organic dust extract (ODE) samples were considered 100% and diluted to 1-5% (v/v) before use  
165 in experiments.

#### 166 *Cell culture and treatments*

167 Immortalized human monocytic cells (THP1, ATCC TIB-202™) were used in this study. These  
168 cell lines have previously been used to study innate inflammatory responses to ODE (Nath  
169 Neerukonda et al., 2018). THP1 cells were cultured in RPMI 1640 at 37°C in a humidified chamber  
170 with 5% CO<sub>2</sub>. The RPMI 1640 medium was supplemented with 10% (v/v) heat-inactivated FBS,  
171 2 mM L-glutamine, 10 mM HEPES, 1.5 g/L sodium bicarbonate, 1 mM sodium pyruvate, 100 IU/ml  
172 penicillin, and 100  $\mu$ g/ml streptomycin (Gibco) and 1  $\mu$ g/mL of Amphotericin B (Sigma-Aldrich).  
173 Cells were subcultured once a week and the morphology was observed. Approximately 4 to 5-  
174 day old cultures were used for experiments. Treatments were done in 1% FBS-containing medium  
175 for 24 hours. All groups with treatment details are outlined in figure 1.

176 Ethyl pyruvate (EP) was reconstituted in Ringer's solution and used at a final concentration of 2.5  
177  $\mu$ M in the cell culture medium. Mitochondrial specific drug mitoapocynin (MA) was diluted in  
178 dimethyl sulfoxide (DMSO) and used at a final concentration of 10  $\mu$ M (Ghosh et al., 2016; Langley  
179 et al., 2017).

180 Cells were treated with either medium (control) or ODE (1% v/v) followed by a co-treatment with  
181 either EP (2.5  $\mu$ M) or MA (10  $\mu$ M) for 24 hours, with corresponding time matched controls.  
182 Following the treatments, samples were processed at 24 hours for various assays.

#### 183 **Table 1. Stock and working concentrations of treatments**

| <b>Treatments</b> | <b>Stock concentration</b> | <b>Working concentration (in 1% FBS-containing medium)</b> |
|-------------------|----------------------------|------------------------------------------------------------|
| <b>ODE</b>        | 100% in HBSS               | 1%                                                         |
| <b>EP</b>         | 5 mM in ringer's solution  | 2.5 $\mu$ M                                                |
| <b>MA</b>         | 1 mM in DMSO               | 10 $\mu$ M                                                 |

184

#### 185 *Cell viability and MTT assay*

186 Prior to conducting experiments, cell viability was assessed. Live/dead cell count was determined  
187 by 4% trypan blue dye (EMD Millipore) exclusion and percentage viability was calculated.  
188 Population of cells with more than 95% viability were used for the experiments.

189 The MTT assay has been widely used in the estimation of LC50 and cell viability by measuring  
190 the formazan produced when mitochondrial dehydrogenase enzymes cleave the tetrazolium ring  
191 (Latchoumycandane et al., 2005). In this study, we used the MTT assay to determine the LC50  
192 of ODE in THP1 cells. Cells were seeded (20,000 cells/well) in a 96-well culture plate and treated  
193 with ODE for 24 hours in 1% FBS-containing RPMI medium. After the treatment, the cells were  
194 washed with PBS and incubated with 0.5 mg/mL of MTT in 1% FBS-containing RPMI medium for  
195 3 hours at 37°C. The supernatant was removed, and MTT crystals were solubilized in 100  $\mu$ l of  
196 DMSO. Absorbance was measured with the SpectraMax spectrophotometer (Molecular Devices  
197 Corporation) at 570 nm with the reference wavelength at 630 nm.

#### 198 *Transmission Electron Microscopy*

199 Post-treatment THP1 cells were washed twice with RPMI and fixed for 45 min in a fixative solution  
200 (2% Glutaraldehyde in complete culture medium). The samples were centrifuged, and the pellet  
201 fixed again with 1.5% Glutaraldehyde solution in Na-Cacodylate buffer 0.1 M. A final post-fixation  
202 (2 h) in 1% OsO<sub>4</sub> solution in Na-Cacodylate buffer 0.1 M was performed. The samples were mixed  
203 with uranyl acetate 2% (w/v) and incubated for 5 min, and then, 5  $\mu$ l was applied to carbon-coated  
204 copper grids. Images were taken using a JEOL 2100 200-kV scanning and transmission electron  
205 microscope with a Thermo Fisher Noran System 6 elemental analysis system. TEM was operated  
206 at 80 kV, and images were obtained at 2,000 $\times$  to 12,000 $\times$  magnification. (Electron Microscopy  
207 Facility, Iowa State University).

#### 208 *Morphological analysis*

209 Mitochondrial shape descriptors and size measurements were obtained using ImageJ (National  
210 Institutes of Health) by manually tracing only clearly discernible outlines of mitochondria on TEM  
211 micro-graphs (Picard et al., 2013). Surface area (or mitochondrial size) is reported in  $\mu\text{m}^2$ ;  
212 perimeter in  $\mu\text{m}$ ; circularity [ $4 \times (\text{surface area}/\text{perimeter}^2)$ ]; and Feret's diameter represents the  
213 longest distance ( $\mu\text{m}$ ) between any two points within a given mitochondrion. Computed values  
214 were imported into Microsoft Excel and Prism 8.0 for data analysis.

#### 215 *Subcellular fractionation*

216 Whole cell and subcellular protein lysate extractions (cytosol and mitochondria) were performed  
217 at 4°C using cold reagents. For whole cell protein lysates, cell pellets were subjected to lysis using  
218 RIPA buffer [with protease and phosphatase inhibitors] (ThermoFisher Scientific). Subcellular  
219 fractionation of cell pellets for isolation of mitochondria was done using the Mitochondria Isolation  
220 Kit for Cultured Cells (ThermoFisher Scientific) according to the manufacturer's instructions. The  
221 whole cells, cytosolic fraction and isolated mitochondria were lysed with RIPA buffer [with  
222 protease and phosphatase inhibitors] for 30 min at 4°C and periodic sonication on ice, followed  
223 by centrifugation to collect lysate. Protein concentration of fractions were determined by Bradford  
224 assay (Bio-Rad) and were stored at -80°C until use.

#### 225 *Mt DNA isolation and long-range PCR*

226 To determine mitochondrial DNA (mtDNA) leakage, mtDNA was isolated from mitochondria-free  
227 cytosolic fraction of the cells. Mitochondrial DNA from cytosolic fractions was extracted using the  
228 Genomic DNA Purification kit (ThermoFisher Scientific) as per the manufacturer's instructions.  
229 The purity and concentration of the isolated DNA was measured using NanoDrop (NanoVue Plus  
230 Spectrophotometer, GE Healthcare). Due to low concentrations, the mtDNA was first amplified  
231 by long range PCR. The primers used were: mtDNA gene, sense: 5'-  
232 TGAGGCCAAATATCATTCTGAGGGGC-3' and antisense: 5'-  
233 TTTCATCATGCGGAGATGTTGGATGG-3' (Liu et al., 2015). PCR reactions were performed at  
234 94°C for 1 min followed by 30 cycles at 98°C for 10 s, 60°C for 40 s, 68°C for 16 min and a final  
235 elongation for 10 min (Liu et al., 2015). Confirmation of the presence of mtDNA was done by  
236 separating the product by electrophoresis on a 0.8% agarose gel stained with ethidium bromide.  
237 The concentration of amplified mtDNA obtained was adjusted to ensure equal amounts of  
238 template mtDNA in each sample used for qPCR reaction.

#### 239 *Quantitative Real-Time PCR*



240 Change in fold change of mtDNA was measured by qPCR with primers specific to mitochondrial  
241 NADH dehydrogenase 1 (*mtND1*). 5 µL of SYBR Green Mastermix (Thermo Fisher Scientific), 1  
242 µL of primers, 2-3 µL of DNase/RNase free water and 1 µg of amplified mtDNA was used. The  
243 primers for genes of interest were synthesized at Iowa State University's DNA Facility. The  
244 primers used were: *mtND1* gene, sense: 5'-GGCTATATACAACACTACGCAAAGGC-3' and  
245 antisense: 5'-GGTAGATGTGGCGGGTTTTAGG-3'; 16s (housekeeping gene), sense: 5'-  
246 CCGCAAGGGAAAGATGAAAGAC-3' and anti-sense: 5'-TCGTTTGGTTTCGGGGTTTC-3'. No-  
247 template and no-primer controls and dissociation curves were run for all reactions to exclude  
248 cross-contamination. The qRT-PCR reactions were run in a QuantiStudio 3 system  
249 (ThermoFisher) and the data was analyzed using  $2^{-\Delta\Delta CT}$  method (Livak and Schmittgen, 2001).

#### 250 *Western blot analysis*

251 Lysates (whole cell, cytosol and MT) containing equal amounts of protein (20 µg/sample), along  
252 with a molecular weight marker (Bio-Rad), were run on 10–15% sodium dodecyl  
253 sulfate/polyacrylamide gel electrophoresis (SDS-PAGE) as previously described (Bhat et al.,  
254 2019). Proteins were transferred to a nitrocellulose membrane and nonspecific binding sites were  
255 blocked with Licor Odyssey blocking buffer. To investigate mitochondrial dysfunction, the  
256 membranes were then incubated with different primary antibodies such as MFN1, MFN2, OPA1,  
257 DRP1, PINK1, Parkin, BNIP3, Cytochrome C, COX4i2, Bcl-2, Bcl-XL, mtTFA, SOD2, Caspase 1  
258 and Caspase 3 (1:1000 dilution). HMGB1 expression in mitochondrial fractions was measured  
259 using anti-HMGB1 antibody (1:5000 dilution). Next, membranes were incubated with one of the  
260 following secondary antibodies: Alexa Fluor 680 goat anti-mouse, Alexa Fluor 680 donkey anti-  
261 rabbit or Alexa Fluor 800 donkey anti-rabbit (1:10,000; Invitrogen). To confirm equal protein  
262 loading, blots were probed with a β-actin antibody (AbCam; 1:10,000 dilution). Western blot  
263 images were captured using Odyssey® CLx IR imaging system (LI-COR Biotechnology) and  
264 analysis was performed using ImageJ (National Institutes of Health).

#### 265 *Mitochondrial activity and MitoSOX assay*

266 Cells were seeded (50,000 cells/well) in a 96-well culture plate and treated for 24 hours. After  
267 treatment, the media was removed and 100 µl of 200 nM MitoTracker green and 5 µM MitoSOX  
268 red dye diluted in 1% FBS-containing RPMI medium was added into each well and incubated at  
269 37°C for 15 min. Following incubation, the cells were washed with 1% FBS-containing RPMI  
270 medium and fluorescence intensity was measured by spectrophotometer reading taken at  
271 excitation/emission wavelengths of 485/520 nm and 510/580, respectively (SpectraMax M2

272 Gemini Molecular Device Microplate Reader). The results were expressed as percentage mean  
273 fluorescence intensity (%MFI) relative to control.

#### 274 *Mitochondrial calcium influx measurement by rhod-2AM staining*

275 Mitochondrial calcium influx ( $[Ca^{2+}]_{mito}$ ) in THP1 cells was measured using the rhod-2AM dye. The  
276 concentration of the isolated mitochondria was measured by Bradford assay in order to maintain  
277 consistency in the number of mitochondria loaded into the wells of a 96-well plate. A protein  
278 concentration of 100 ug was loaded into each well and 10 $\mu$ M Rhod-2AM (Abcam) dye diluted in  
279 1% FBS-containing RPMI medium was added and incubated at 37°C for 30 minutes in order to  
280 stain the mitochondria. The cells were washed with 1% FBS-containing RPMI medium and  
281 fluorescence was read at excitation/emission wavelengths of 552 nm/581 nm using a  
282 spectrophotometer reader (SpectraMax M2 Gemini Molecular Device Microplate Reader).

#### 283 *Griess assay*

284 Griess assay was performed as described previously (Gordon et al., 2011). Briefly, nitric oxide  
285 secretion was measured (representing reactive nitrogen species (RNS)) as nitrite levels in cell  
286 culture media using Griess reagent (Sigma-Aldrich) and sodium nitrite standard curve, prepared  
287 using a stock solution of 200  $\mu$ M. The assay was performed in a 96 well-plate and absorbance  
288 was measured at 550 nm (SpectraMax M2 Gemini Molecular Device Microplate Reader). The  
289 results were expressed as  $\mu$ M concentration of nitrite secreted.

#### 290 *Statistical analysis*

291 Data analysis and graphical representation was performed using GraphPad Prism 8.0 software  
292 (GraphPad Prism 8.0, La Jolla, CA, USA). Data was analyzed with one-way ANOVA with Tukey's  
293 multiple comparison test and a p-value of < 0.05 was considered to be statistically significant.

## 294 **Results**

#### 295 *Exposure to ODE impacts the cellular and mitochondrial morphology*

296 TEM images showed that THP1 cells treated with media alone (controls) showed normal  
297 morphology with healthy mitochondria (Fig. 2a & 2b). After ODE treatment, cytoplasmic  
298 vacuolization and pseudopod formation was observed which suggests differentiation of the cells  
299 to form activated macrophages (Fig. 2a) (Krysko et al., 2006). In addition, the mitochondria  
300 seemed larger in size and some were elongated with reduced cristae number and/or deformed  
301 cristae (Fig. 2b). On addition of 2.5  $\mu$ M ethyl pyruvate (EP), formation of multinucleated giant cells

302 was observed, which is stated to be commonly observed in diverse infectious and non-infectious  
303 inflammatory conditions (Milde et al., 2015; Miron and Bosshardt, 2017). Similar to ODE  
304 exposure, the mitochondria were swollen and showed disorganized cristae, along with the  
305 presence of calcium sequestration bodies in the mitochondrial matrix (Fig. 2b). In contrast,  
306 exposure to 10  $\mu$ M mitapocyanin (MA) seemed to oppose the impact of ODE on the cells and  
307 restore it (Fig. 2b). Almost no cytoplasmic vacuolization was observed, and mitochondria showed  
308 decreased signs of damaged cristae, albeit conformed to an elongated morphology (Fig. 2a &  
309 2b). This suggests that MA could have a protective effect on ODE exposed macrophages.

310 In order to quantify what was observed in the TEM images, mitochondria were individually traced  
311 from the TEM. Compared to controls, exposure to ODE significantly reduced the mitochondrial  
312 size (Fig. 2c). A similar decrease was seen in the presence of MA as well, whereas EP  
313 significantly increased the size, similar to that of control (Fig. 2c). A similar pattern was seen with  
314 the mitochondrial circularity, co-treatment with MA showing the most decrease compared to other  
315 treatments (Fig. 2d). Other morphological parameters such as perimeter, and Feret's diameter  
316 did not differ between any of the treatment conditions (Fig. 2e & 2f). Taken together, this suggests  
317 that exposure to ODE activates a specific mechanism that acts towards altering the mitochondrial  
318 dynamics within the cell.

### 319 *Targeted antioxidant therapy promotes mitochondrial fission*

320 The mitochondrial membrane is remodeled continuously through cycles of fission and fusion  
321 events. The delicate balance of these events helps in controlling mitochondrial structure and  
322 function (Tilokani et al., 2018; Wai and Langer, 2016). In order to accurately interpret the impact  
323 of ODE exposure on the morphology of mitochondria, the expression of markers responsible for  
324 these dynamic events was observed. During ODE exposure, the expression of mitofusin 2 (MFN2)  
325 was significantly increased compared to control (Fig. 3a & 3c). In contrast, mitofusin 1 (MFN1)  
326 and optic atrophy 1 (OPA1) did not show any significant changes in protein levels between control  
327 and treatments (Fig. 3a, 3b & 3d). MFN1 and MFN2 are outer mitochondrial membrane GTPases  
328 that are responsible for the promotion of mitochondrial fusion (Tilokani et al., 2018). MFN2 alone  
329 can induce mitochondrial fragmentation and is a crucial regulator of mitochondria-endoplasmic  
330 reticulum (ER) contact site tethering (Filadi et al., 2018; Tilokani et al., 2018). Increased  
331 expression of dynamin-related protein 1 (DRP1) was observed in both ODE and MA treatments,  
332 indicative of mitochondrial fission as a result of oxidative stress and/or increased cytosolic calcium  
333 levels (Fig. 3e) (Eisner et al., 2018). Furthermore, to corroborate whether mitochondrial  
334 morphological changes are associated with mitochondrial number, change in mitochondrial mass

335 on treatment was measured by mitotracker green fluorescence. There was a significant increase  
336 in the mitochondrial mass on exposure to ODE and EP, while on exposure to MA levels were  
337 comparable to controls (Fig. 3f). This could be a cellular response in order to compensate for the  
338 reduced mitochondrial function (Nugent et al., 2007). Collectively, the results suggest an effort to  
339 rescue mitochondrial biogenesis by increased MFN2 mediated fusion in response to ODE-  
340 induced cellular stress by maintaining a functional population of mitochondria within the cell.

#### 341 *ODE exposure induces selective targeting of mitochondria for autophagy (mitophagy)*

342 Due to the increased MFN2 expression observed, it can be questioned whether this increase is  
343 favoring the process of mitochondrial elimination (Fig. 3a & 3c). This process involved in the  
344 regulation of mitochondrial dynamics is also known to be closely associated with the process of  
345 mitochondrial quality control by autophagy, known as mitophagy (Ding and Yin, 2012; Filadi et  
346 al., 2018). Mitophagy is critical for maintaining proper cellular functions (Ding and Yin, 2012).  
347 Investigation of whether the mitochondria was subjected to autophagic clearance on ODE  
348 exposure was done. The expression of the two important mediators of mitophagy, PTEN-induced  
349 kinase 1 (PINK1) and the E3 ubiquitin protein ligase Parkin, were investigated. It was observed  
350 that there was increased Parkin expression in the presence of ODE compared to controls, while  
351 expression of PINK1 remained unchanged (Fig. 4a & 4c). Expression of Parkin remained  
352 comparable to the control in the presence of EP or MA (Fig. 4a & 4b). Parkin has been shown to  
353 be highly essential in the induction of mitophagy (Ding and Yin, 2012; D. Narendra et al., 2010;  
354 Narendra et al., 2008; D. P. Narendra et al., 2010). PINK1 and Parkin are known to physically  
355 interact with each other in order to induce mitophagy, and the translocation of Parkin to the  
356 mitochondria is said to be dependent on PINK1 (Narendra et al., 2008; D. P. Narendra et al.,  
357 2010). This indicates that ODE-induced cellular stress is leading to Parkin mediated mitochondrial  
358 clearance.

359 The expression of BNIP3, a mitochondrial Bcl-2 Homology 3 (BH3)-only protein, was also  
360 observed. BNIP3 activates the mitochondrial permeability transition (MPT), which is associated  
361 with increased ROS production and excessive autophagy (Ney, 2015). BNIP3 levels remained  
362 unchanged on exposure to ODE and EP (Fig. 4a & 4d). While, co-treatment with MA significantly  
363 decreased BNIP3 expression (Fig. 4d). This indicates that although the process of mitophagy may  
364 or may not be occurring via BNIP3, MA is certainly BNIP3 mediated MPT thus having a protective  
365 effect on the mitochondria.

#### 366 *ODE exposure impacts mitochondrial membrane permeability*

367 Mitochondrial oxidative phosphorylation (OXPHOS) pathway is critical in determining and  
368 maintaining the immunomodulatory phenotype of activated macrophages (Kelly and O'Neill,  
369 2015). Considering the changes in mitochondrial structure and dynamics, the question of whether  
370 ODE has an impact on the mitochondrial OXPHOS pathway was investigated. ODE increased  
371 levels of cytochrome c in the cytosol of the cells, compared to that in the mitochondrial fraction  
372 (Fig. 5a-5c). Release of cytochrome c is considered a key initial step in the apoptotic process (Cai  
373 et al., 1998; Ott et al., 2002). On the other hand, MA significantly decreased the levels of cytosolic  
374 cytochrome C (Fig. 5a-c). Concurrently, there is a significant decrease in the expression of lung-  
375 specific isoform of cytochrome c oxidase (COX4i2) in the mitochondrial fraction on ODE exposure,  
376 with no change on treatment with either EP or MA (Fig. 5d). COX4i2 is considered to be a rate-  
377 limiting step of the electron transport chain (ETC) in intact mammalian cells under physiological  
378 conditions (Hüttemann et al., 2012). A loss of expression would suggest dysfunctional OXPHOS  
379 pathway (Hüttemann et al., 2012). There is also an increase in superoxide dismutase 2 (SOD2)  
380 in the cytosol during ODE exposure (Fig. 5e). Treatment with EP or MA significantly decreased  
381 SOD2 expression compared to ODE (Fig. 5e). Presence of SOD2 is known to impart tolerance  
382 during high oxidative stress and reduce superoxide accumulation within the mitochondria (Fukui  
383 and Zhu, 2010; Ishihara et al., 2015). To identify whether this is true, mitochondrial superoxide  
384 levels were measured by MitoSOX fluorescence. ODE significantly decreased the mitochondrial  
385 superoxide, while treatment with MA increased the levels comparable to control (Fig. 5f). ODE  
386 mediated decrease could either be a consequence of a leaky mitochondrial membrane or the  
387 action of high SOD2 expression. Reactive nitrite species (RNS) released into the extracellular  
388 environment was measured by Griess assay. ODE exposure increased the levels of RNS in media  
389 at 24 hours, which treatment with EP and MA significantly attenuated RNS secretion (Fig. 5g).  
390 The results collectively show that in response to ODE, there is an increase in mitochondrial  
391 membrane permeability leading to leakage of core proteins involved in the maintenance of  
392 mitochondrial function. MA, on the other hand, seems to be maintaining the mitochondrial  
393 membrane integrity by acting as an inhibitor of peroxynitrite formation and RNS secretion, thus  
394 potentially restoring the damage induced on ODE exposure (Ghosh et al., 2016; Stefanska and  
395 Pawliczak, 2008).

#### 396 *ODE induces the secretion of mitochondrial DAMPs*

397 Mitochondrial secondary messengers, which are mitochondrially derived molecules, can act as  
398 mitochondrial damage-associated molecular patterns (mtDAMPs) when produced excessively or  
399 are secreted into other cellular locations (Cloonan and Choi, 2012). These mtDAMPs result in the

400 induction of a cascade of inflammatory responses within the cell, thus resulting in adverse effects  
401 on the cell and tissue (Zhang et al., 2010). The levels of mitochondrial transcription factor A  
402 (mtTFA) measured in the mitochondrial and cytosolic fractions, showed a significant increase in  
403 mtTFA in both mitochondria and cytosol on exposure to ODE (Fig. 6a & 6c). While MA treatment  
404 increased mtTFA levels in the mitochondria compared to ODE (Fig. 6a & 6b). At normal  
405 physiological levels, mtTFA is an important regulator of mitochondrial DNA integrity, which when  
406 leaked out from mitochondria acts as a mtDAMP promoting inflammatory responses (Julian et al.,  
407 2013). Due to the increase in mitochondrial membrane permeability and dysfunction seen  
408 previously, levels of mtDNA leaking into the cytosol was determined. ODE increased cytosolic  
409 mtDNA levels, which is abrogated on treatment with EP or MA (Fig. 6d). In addition, there is an  
410 increase in calcium ( $Ca^{2+}$ ) influx into the mitochondria on exposure to ODE, with no significant  
411 change in the presence of either MA or EP co-treatment compared to ODE (Fig. 6e). An increase  
412 in mitochondrial matrix  $Ca^{2+}$  levels has been shown to increase ATP production and is a trigger  
413 for cell death (Finkel et al., 2015). The expression of mitochondrial HMGB1 was determined, as  
414 presence of HMGB1 in the mitochondrial matrix is said to be critical in the regulation of  
415 mitochondrial function (Tang et al., 2011). Compared to control, there is a decrease in  
416 mitochondrial HMGB1 on exposure to ODE, which does not seem to be rescued in the presence  
417 of MA (Fig. 6f). Whereas on EP treatment, mitochondrial HMGB1 is significantly increased  
418 compared to both ODE and MA exposure (Fig. 6f). These findings indicate that with the significant  
419 impact ODE has on the mitochondrial quality control and biogenesis there is a release of  
420 mtDAMPs into the cytosol which could be leading to a cascade of inflammatory responses  
421 consequently causing cell death (Qi et al., 2015; Tang et al., 2011).

#### 422 *Mitoapocynin does not intervene in ODE mediated caspase-1 upregulation*

423 As mentioned previously, release of mtDAMPs results in the activation of various inflammatory  
424 responses. It has been shown that release of mtDNA and mitochondrial reactive oxygen species  
425 (mROS) activates the NLRP3 inflammasome pathway (Gong et al., 2018). Upstream of NLRP3  
426 activation, cleavage of pro-caspase 1 to caspase 1 is seen due to increased influx of calcium  
427 induced by leaky mitochondria (Murakami et al., 2012). Based on these evidences, changes in  
428 the expression of pro-caspase 1 and caspase 1 was measured. Compared to control, ODE and  
429 MA exposure increased expression of pro-caspase 1, EP maintained the expression comparable  
430 to control (Fig. 7a & 7b). There was a significant increase expression of cleaved caspase 1 (p10)  
431 on ODE exposure and MA co-treatment, with the former inducing a higher expression than the  
432 latter (Fig. 7a & 7c). Treatment with EP significantly decreased cleavage, which is consistent with

433 the expression of pro-caspase 1. Expression of pro-caspase 3 and its cleaved product, an  
434 apoptosis executioner, was measured in order to determine if ODE is inducing a caspase 3  
435 mediated apoptosis. Although ODE decreased the expression of pro-caspase 3, no significance  
436 in the levels was observed on exposure to treatments (Fig. 7d & 7e). In addition, there was no  
437 caspase 3 cleavage product observed on exposure to any of the treatments (Fig. 7d). This  
438 suggests that ODE could be mediating a downstream inflammatory cascade via caspase 1  
439 cleavage and activation, i.e. NLRP3 inflammasome activation and pro-IL-1 $\beta$  cleavage and  
440 release. This is not remedied by co-treatment with either MA or EP. Whereas, caspase 3 may not  
441 be a key mediator in ODE mediated inflammation.

#### 442 *Mitoapocynin therapy does not inhibit ODE induced apoptosis*

443 The production of ROS is known to be a trigger for cell death (Brand et al., 2004; Kim, 2005). The  
444 antiapoptotic Bcl-2 family proteins Bcl-2 and Bcl-XL play an important role in inhibiting  
445 mitochondria-dependent extrinsic and intrinsic cell death pathways (Green and Kroemer, 2004).  
446 To identify the impact OD-induced mitochondrial dysfunction and rescue may have on cellular  
447 apoptosis, expression of Bcl-2 and Bcl-XL were measured. ODE decreased the expression of Bcl-  
448 2, with no change on MA or EP intervention (Fig. 8a). On the other hand, Bcl-XL expression was  
449 downregulated on ODE exposure, but was significantly increased on treatment with MA or EP  
450 (Fig. 8b). This change in expression of Bcl-XL was corroborated by measuring cell viability by  
451 MTT colorimetric assay. The percentage cell viability pattern observed correlated with the pattern  
452 of expression of Bcl-XL, where loss of cell viability on OD exposure was rescued by treatment  
453 with EP or MA (Fig. 8c). Together, these results are indicative that the increase in Bcl-XL  
454 expression on treatment with EP or MA, could be blocking the effect of BNIP3 (Fig. 4a & 4d) in  
455 inducing the loss of mitochondrial membrane permeability or the activation of caspase dependent  
456 or independent apoptotic pathway (Kim, 2005). Thus, regulating the production of ROS and  
457 decreasing the probability of apoptotic and non-apoptotic cell death.

#### 458 **Discussion**

459 Airway inflammation due to persistent exposure to OD is a key contributor to the development of  
460 respiratory symptoms and airflow obstruction in exposed workers (Cole et al., 2000; Nordgren  
461 and Charavaryamath, 2018). Continuous exposure to organic dust has been shown to alter innate  
462 immune responses in the airways (Charavaryamath and Singh, 2006; Sethi et al., 2017; Wunschel  
463 and Poole, 2016). These responses include cellular recruitment, release of pro-inflammatory  
464 cytokines and reactive species (ROS/RNS) (Bhat et al., 2019; Nath Neerukonda et al., 2018;

465 Sahlander et al., 2012; Sethi et al., 2017). Previous studies have provided a direct link between  
466 such innate immune signaling and mitochondrial dynamics suggesting a crucial role in the  
467 activation and control of airway disease progression (Cloonan and Choi, 2012; Eisner et al.,  
468 2018). *In vitro* and *in vivo* studies have shown a link between airway diseases such as, influenza,  
469 sepsis-induced lung injury, pneumonia, and RSV infection, and facets of mitochondrial responses  
470 (Cloonan and Choi, 2016; Wunschel and Poole, 2016). In this study, using THP1 cells as an *in*  
471 *vitro* model for alveolar macrophages we provide evidence of significant changes in the dynamics,  
472 integrity and function of cellular mitochondria upon exposure to OD and how the use of  
473 mitoapocynin (MA), a novel mitochondrial targeting NOX2 inhibitor, or ethyl pyruvate (EP), an  
474 inhibitor of translocation of HMGB1, could rescue OD-induced mitochondrial changes and reduce  
475 inflammation.

476 Our TEM results demonstrate that, upon ODE exposure, there is increased presence of  
477 cytoplasmic vacuoles and pseudopods which is a characteristic feature of an activated  
478 macrophage <sup>28</sup>. Treatment with MA or EP did not prevent the ODE-induced morphological  
479 changes. When cells were exposed to EP co-treatment, we found formation of multinucleated  
480 giant cells (MGC). MGC are a common feature of granulomas that develop during certain  
481 infections, the most prominent example being tuberculosis or as a consequence of foreign body  
482 reactions (FBR) (Milde et al., 2015; Miron and Bosshardt, 2017).

483 To understand the impact of OD-induced inflammation on mitochondrial biogenesis, we explored  
484 factors involved in mitochondrial morphological changes. Mitochondria are highly dynamic  
485 organelles whose functions are essential for cell survival. They continuously change their function,  
486 position, and structure to meet the metabolic demands of the cells during homeostatic conditions  
487 as well as at times of stress (Eisner et al., 2018; Wai and Langer, 2016). With our TEM findings  
488 we observe distinct changes in the mitochondrial surface area and circularity on OD exposure  
489 and antioxidant therapy indicating that OD-exposure has an impact on mitochondrial dynamics  
490 and functions.

491 Mitochondria contain outer and inner mitochondrial membranes (OMM and IMM, respectively),  
492 which border the intermembrane space (IMS) and the matrix. Each of these compartments has  
493 discrete functions in metabolism, biosynthetic pathways, and signaling (Pagliarini and Rutter,  
494 2013). Mitochondrial dynamics involve reshaping, rebuilding, and recycling events that support  
495 mitochondrial stability, abundance, distribution, and quality, and allow compensatory changes  
496 when cells are challenged (Mishra and Chan, 2014). Key mitochondrial reshaping mechanisms  
497 are mitochondrial fission and fusion. Mitochondrial fission is characterized by division of one



498 mitochondrion into two daughter mitochondria, whereas mitochondrial fusion is the union of two  
499 mitochondria resulting in one mitochondrion (Mishra and Chan, 2014). The deregulation of these  
500 spatio-temporal events results in either a fragmented network characterized by a large number of  
501 small round-shaped mitochondria or a hyper fused network with elongated and highly connected  
502 mitochondria (Tilokani et al., 2018; Wai and Langer, 2016). These balanced dynamic transitions  
503 are not only required to ensure mitochondrial function but also to respond to cellular needs by  
504 adapting to nutrient availability and metabolic state of the cell.

505 Mitochondrial fusion is mediated by dynamin-related GTPases mitofusin 1 and 2 (MFN1/2) on the  
506 outer mitochondrial membrane (OMM) and by dynamin-related protein optic atrophy 1 (OPA1) on  
507 the inner mitochondrial membrane (IMM). Mitochondrial fission requires the recruitment of  
508 dynamin-related protein 1 (DRP1) from the cytosol to its specific receptors (Mishra and Chan,  
509 2014; Tilokani et al., 2018). Lack of either MFN1 or MFN2 expression can display aberrant  
510 mitochondrial morphology. While a lack of MFN1 induces mitochondrial fragmentation, the  
511 absence of MFN2 exhibits swollen spherical mitochondria. In our findings, we see increased  
512 MFN2 expression on ODE exposure, which could be leading to increased mitochondrial  
513 fragmentation and increased mitochondrial mass (Chen et al., 2003). An increase in the rate of  
514 mitochondrial proliferation is probably a cellular response to counteract the loss of mitochondrial  
515 function and recover ATP synthesis capacity. We also see an increase in DRP1 expression upon  
516 exposure to both ODE and MA co-treatment. Mitochondrial fission is essential for the inheritance  
517 and partitioning of mitochondria during cell division. Inhibition of DRP1-mediated mitochondrial  
518 fission has been reported to cause cellular dysfunction and replication (Qi et al., 2015). This can  
519 be corroborated by the decrease in cell viability with ODE exposure. The low mitochondrial mass  
520 observed with exposure to MA could be a means by which the antioxidant therapy is overcoming  
521 the increase in dysfunctional mitochondria.

522 Studies have shown that the MFN2 mediates Parkin, an E3 ubiquitin ligase, recruitment to  
523 damaged mitochondria (Filadi et al., 2018). Parkin binds to MFN2 in a PINK1-dependent manner  
524 and promotes Parkin-mediated ubiquitination of damaged mitochondria, thus leading to a  
525 mitochondria quality control process, known as mitophagy (Ding and Yin, 2012; Narendra et al.,  
526 2008; D. P. Narendra et al., 2010). This corroborates our finding wherein we see an increase in  
527 MFN2 and Parkin expression upon ODE exposure, from which we can conclude that OD-induced  
528 cell stress leads to mitophagy. Mitophagy is a process of mitochondrial quality control where  
529 damaged or defective mitochondria are removed by selective encapsulation into double-  
530 membraned autophagosomes that are delivered to lysosome for degradation (Ding and Yin,

531 2012). Mitochondrial biogenesis and mitophagy allow cells to quickly replace metabolically  
532 dysfunctional mitochondria.

533 Albeit no significant change in BNIP3 expression was observed with exposure to OD or EP.  
534 However, BNIP3 expression was decreased on intervention with MA. This brings into question  
535 how the low levels of BNIP3 is affecting the mitochondrial and cellular function. BNIP3, a  
536 transmembrane protein located in the OMM, imparts some pro-cell death activity and is known to  
537 regulate mitophagy (Ney, 2015). BNIP3 has been shown to activate the mitochondrial  
538 permeability transition (MPT) and degradation of proteins involved in oxidative phosphorylation,  
539 in turn leading to cell death without cytochrome c release or caspase activation (Landes et al.,  
540 2010; Quinsay et al., 2010; Rikka et al., 2011; Velde et al., 2000). On addition of BNIP3 to isolated  
541 mitochondria, it was observed that BNIP3 caused cytochrome c release, depolarization, and  
542 swelling (Kim et al., 2002). This phenomenon has been linked to BNIP3-mediated  
543 permeabilization of inner and outer mitochondrial membrane involving the disruption of OPA1  
544 complex and remodeling of the inner mitochondrial membrane (Landes et al., 2010). In  
545 comparison to our findings, we can assume that MA-induced decrease in BNIP3 expression could  
546 be reducing MPT and cell death, thus improving overall cellular function. Another potential  
547 mechanism by which BNIP3 is promoting apoptosis is by competition for binding to Bcl-2 (or a  
548 related protein) which liberates Beclin-1 from Bcl-2 complexes and activates autophagy. There is  
549 evidence showing that Bcl-XL enhances BNIP3-induced mitophagy (Maiuri et al., 2007; Pattingre  
550 et al., 2005). This correlates with our findings wherein we see decreased Bcl-XL expression on  
551 exposure to OD which is significantly upregulated on intervention with EP or MA. Taken together  
552 we see a decrease in overall cell viability on OD exposure which is rescued by MA intervention.

553 One of the prominent players in cell death is cytochrome c. Based on previous studies, we  
554 expected that with the decrease in cell viability and induction of mitophagy there would be a  
555 release of cytochrome c from the mitochondria into the cytosol. Cytochrome c, a peripheral protein  
556 of the mitochondrial inner membrane (IMM), is known to function as an electron shuttle between  
557 complex III and complex IV of the respiratory chain and its activity (Cai et al., 1998; Garrido et al.,  
558 2006). And its release from the IMM has been implicated in caspase activation and mitochondrial  
559 outer membrane permeabilization (MOMP), leading to cell death. Cumulative data suggest that  
560 cytochrome c release does not always take place in an all-or-nothing manner as previously  
561 believed, but instead follows a biphasic kinetics (Ott et al., 2002). The first wave is induced by  
562 apoptotic signals directed to mitochondria which provokes MOMP and cytochrome c release, thus  
563 disrupting the electron transport and leading to an increased generation of ROS. The second

564 wave involves cytochrome c mediated activation of caspases that subsequently enters the  
565 mitochondria through the permeabilized OMM and induce the complete block of the respiratory  
566 chain, eventually resulting in cell death. Comparing this to our findings we observe that with the  
567 increase in cytosolic cytochrome c on OD exposure there is a deficiency of levels of COX4i2 (COX  
568 subunit 4 isoform 2), a terminal enzyme in the OXPHOS machinery. Loss of COX4i2 results in  
569 decreased COX activity and decreased ATP levels (Hüttemann et al., 2012). This loss is not  
570 reversed by the use of antioxidant therapy, albeit MA was capable of downregulating the release  
571 of cytochrome c. This is indicative that although antioxidant therapy can decrease the cytosolic  
572 release of cytochrome c, there could be other secondary factors resulting in the loss of COX4i2.  
573 NADPH oxidase is the main source of ROS that is closely linked to mitochondrial ROS production  
574 (Zorov et al., 2014). Growing evidence suggests that ROS generated can increase expression of  
575 proinflammatory mediators (Bhat et al., 2019; Brand et al., 2004). Indeed, various PAMP  
576 molecules can stimulate ROS production by NADPH oxidase, especially NOX1, NOX2, NOX4  
577 (Ghosh et al., 2016). Being a NOX2 inhibitor, treatment with MA seems to bring mitochondrial  
578 superoxide levels to that of the controls, whereas with OD and EP we see a decrease. This could  
579 be a consequence of a leaky mitochondria which is enabling the release of the superoxide ion  
580 into the cytosol thus promoting further damage to the cell. On the other hand, seeing the increase  
581 in the SOD2 expression allows us to believe that there are factors promoting the attenuation of  
582 oxidative stress mediated cellular injury. This increase could be due to a variety of  
583 proinflammatory cytokines, such as interleukin 1 (IL-1), IL-4, IL-6, tumor necrosis factor  $\alpha$ ,  
584 interferon  $\gamma$ , and the bacterial endotoxin lipopolysaccharide, which are considered to be robust  
585 SOD2 activators (Fukui and Zhu, 2010, p. 2). SOD2 is also said to be regulated by RNS, where  
586 increased peroxynitrite levels can lead to its enzymatic inhibition (Redondo-Horcajo et al., 2010).  
587 These antagonistic roles that peroxynitrite and superoxide radicals have in regulating SOD2  
588 expression and activity leads us to believe that mitochondrial antioxidant response is  
589 dysregulated.

590 A wide variety of mitochondrial-derived molecules, which act as second messengers, can also  
591 behave as mitochondrial damage-associated molecular patterns (mtDAMPs) when produced in  
592 excess or released into an alternative cellular compartment. Activation of MPT during  
593 mitochondrial dysfunction has also been shown to cause leakage of mtDAMPs, primarily  
594 mitochondrial DNA (mtDNA) into the cytosol and activating caspase 1 (Nakahira et al., 2011). The  
595 release of mtDNA has been shown to cause neutrophil mediated organ injury by systemic  
596 inflammatory reaction via the activation of DNA sensor cyclic GMP-AMP synthase (cGAS) and  
597 TLR9 pathway, intracellularly (West et al., 2015; Zhang et al., 2010). Mitochondrial transcription

598 factor A (mtTFA) is an integral regulator of mtDNA integrity, which, when released from  
599 mitochondria, acts as a mtDAMP to regulate inflammatory responses (Julian et al., 2013).  
600 Release of mtTFA along with mtDNA during cell damage amplified TNF $\alpha$  and type 1 interferon  
601 release, which plays a critical role in promoting sterile inflammation and autoimmune diseases  
602 (Cantaert et al., 2010; CHAUNG et al., 2012; Julian et al., 2012). This is in line with our findings  
603 where we see an increase in the cytosolic release of mtTFA and mtDNA on OD exposure.  
604 Although antioxidant therapy did not have a significant impact on reducing release of mtTFA, it  
605 did however decrease the release of mtDNA. Being a homolog of mtTFA, HMGB1 was  
606 investigated to understand the impact of its translocation into the mitochondrial can have (Parisi  
607 and Clayton, 1991). Under pathophysiological conditions, nuclear HMGB1 is immediately  
608 transported to the cytoplasm and released into the extracellular space where it acts as a signaling  
609 molecule regulating a wide range of inflammatory responses by binding to TLR2/4 and/or receptor  
610 for advanced glycan end products (RAGE) (Bhat et al., 2019). It has been reported that HMGB1  
611 rescues the impairment of mitochondrial function. In endothelial cells, the translocation of  
612 endogenous HMGB1 from the nucleus to the mitochondria promotes mitochondrial reorganization  
613 (Hyun et al., 2016; Stumbo et al., 2008). In cancer cells, exogenous HMGB1 enters the  
614 mitochondria, which is followed by the formation of giant mitochondria (Gdynia et al., 2016; Hyun  
615 et al., 2016). Therefore, it is likely that the nuclear HMGB1 export would be involved in aberrant  
616 mitochondrial fission or the compensatory responses for maintenance of mitochondrial functions.  
617 However, in the present study we see that treatment with MA does not revert back the levels of  
618 HMGB1 within the mitochondria and match the levels observed on OD exposure.

619 Mitochondria are also key regulators calcium (Ca<sup>2+</sup>) which control a diverse range of cellular  
620 processes, including ROS production. Ca<sup>2+</sup> influx into the mitochondrial matrix ([Ca<sup>2+</sup>]<sub>mito</sub>) has  
621 been shown to be an important regulator of mitochondrial metabolism, and the mobilization of and  
622 regulation of mitochondrial Ca<sup>2+</sup> uptake has been linked to Bcl-XL and voltage-dependent anion  
623 channel (VDAC) interactions (Huang et al., 2013; Jouaville et al., 1999; Pitter et al., 2002). Any  
624 aberrant increase in cytosolic Ca<sup>2+</sup> and resultant [Ca<sup>2+</sup>]<sub>mito</sub> overload can be a trigger for cell death  
625 (Finkel et al., 2015). This overload has also been linked to induction of MPT, resulting in  
626 mitochondrial permeabilization (Finkel et al., 2015; Hunter et al., 1976). This is corroborated by  
627 our findings where we see increase in expression of MPT-inducing markers and [Ca<sup>2+</sup>]<sub>mito</sub> levels  
628 on OD exposure. However, on our observation that Bcl-XL is abrogated, it is safe to assume that  
629 the Ca<sup>2+</sup> influx could possibly be occurring via the interaction of VDAC with Mcl-1, a Bcl-2 family  
630 protein (Huang et al., 2014). Ca<sup>2+</sup> signaling also plays a critical role in the activation of NLRP3  
631 inflammasome by multiple stimuli (Murakami et al., 2012). This is corroborated by our findings

632 wherein we see caspase-1 processing with the increase  $\text{Ca}^{2+}$  levels on OD exposure (Yu et al.,  
633 2014). This would in turn lead to IL-1 $\beta$  processing and release into the extracellular space. The  
634 use of MA does not seem to have any impact on the levels of  $\text{Ca}^{2+}$  accumulation within the  
635 mitochondria which could be inducing an inflammatory cascade not mediated by mitochondria.

## 636 **Conclusion**

637 In conclusion, we document that co-treatment with EP and MA are partially protective as they  
638 rescue some of the ODE-exposure induced deficits. However, these findings lead to new  
639 mechanistic questions on how OD may be inducing mitochondrial dysfunction and cell death. OD  
640 being a complex mixture of contaminants could be inducing a multifactorial immune response and  
641 the mechanism underlying these responses are not yet well understood. Specific signatures of  
642 mitochondrial dysfunction that are associated with disease pathogenesis and/or progression are  
643 becoming increasingly important. Although our current study is limited with the use of a single  
644 immortalized cell line as a model, it provides data on the impact of OD on mitochondrial biogenesis  
645 and function. Future studies using functional (primary alveolar macrophages, precision cut lung  
646 slices) and mouse model would be highly valuable.

## 647 **Acknowledgements**

648 We would like to thank Tracey Stewart at ISU's Roy J. Carver High Resolution Microscopy Facility  
649 for assistance with transmission electron microscopy.

## 650 **Funding**

651 C.C. laboratory is funded through startup grant through Iowa State University and a pilot grant (5  
652 U54 OH007548) from CDC-NIOSH (Centers for Disease Control and Prevention-The National  
653 Institute for Occupational Safety and Health). A.G.K. laboratory is supported by National Institutes  
654 of Health grants (ES026892, ES027245 and NS100090).

## 655 **Potential Conflicts of Interest**

656 AGK has an equity interest in PK Biosciences Corporation located in Ames, IA.  
657 The terms of this arrangement have been reviewed and approved by Iowa State University per  
658 its conflict of interest policies. All other authors have declared no potential conflicts of interest.

## 659 **Author contributions**

660 S.M. Bhat participated in the design of experiments, performed the experiments, analyzed the  
661 data, and wrote the manuscript. D. Shrestha performed the calcium influx assay. N. Massey

662 performed organic dust extraction. L. Karriker collected the organic dust samples and edited the  
663 manuscript. A.G. Kanthasamy provided mitoapocynin and edited the manuscript. C.  
664 Charavaryamath conceptualized the study, participated in the design of the experiments,  
665 performed dust extraction, participated in the interpretation of data and edited the manuscript. All  
666 authors have read and approved the final manuscript.

## 667 **Abbreviations**

668 OD: Organic Dust; ODE: Orgaic Dust Extract; EP: Ethyl Pyruvate; MA: Mitoapocynin; LPS:  
669 Lipopolysaccharide; PGN: Peptidoglycan; PAMPs: Pathogen Associated Molecular Patterns;  
670 COPD: Chronic Obstructive Pulmonary Disease; AHR: Airway hyperresponsiveness; ROS:  
671 Reactive Oxygen Species; RNS: Reactive Nitrogen Species; ATP: Adenosine Triphosphate;  
672 OXPHOS: Oxidative Phosphorylation; HMGB1: High Mobility Group Box 1; STAT: Signal  
673 Transducer and Activator of Transcription; TPP: Triphenylphosphonium; MPTP: 1-Methyl-4-  
674 Phenyl-1,2,3,6-Tetrahydropyridine; iNOS: inducible Nitric Oxide Synthase; NOX: NADPH  
675 Oxidase; MTT: 3-[4,5-dimethylthiazole-2-yl]-2,5-diphenyltetrazolium bromide; TEM: Transmission  
676 Electron Microscopy; DMSO: Dimethyl Sufoxide; mtND1: mitochondrial NADH dehydrogenase 1;  
677 MFN: Mitofusin; OPA1: Optic Atrophy 1; DRP1: Dynamin-related protein 1; ER: Endoplasmic  
678 Reticulum; PINK1: PTEN- induced kinase 1; BNIP3: Bcl-2 Homology 3 (BH3)-only; MPT:  
679 Mitochondrial Permeability Transition; COX4i2: Cytochrome C Oxidase subunit 4 isoform 2; ETC:  
680 Electron Transport Chain; SOD2: Superoxide Dismutase 2; mtDAMPs: mitochondrial Damage  
681 Associated Molecular Patters; mtTFA: mitochondrial Transcription Factor A; MGC: Multinucleated  
682 Giant Cell; FBR: Foreign Body Reactions; OMM: Outer Mitochondrial Membrane; IMM: Inner  
683 Mitochondrial Membrane; IMS: Intermembrane Space; IL: Interleukin; cGAS: cyclic GMP-AMP  
684 synthase; TLR: Toll-like receptor; RAGE: Receptor for advanced glycation end products; VDAC:  
685 Voltage-dependent anion channel

## 686 **References**

- 687 1. Bhat, S.M., Massey, N., Karriker, L.A., Singh, B., Charavaryamath, C., 2019. Ethyl pyruvate  
688 reduces organic dust-induced airway inflammation by targeting HMGB1-RAGE signaling.  
689 *Respiratory Research* 20, 27. <https://doi.org/10.1186/s12931-019-0992-3>
- 690 2. Brand, M.D., Affourtit, C., Esteves, T.C., Green, K., Lambert, A.J., Miwa, S., Pakay, J.L.,  
691 Parker, N., 2004. Mitochondrial superoxide: production, biological effects, and activation of  
692 uncoupling proteins. *Free Radical Biology and Medicine* 37, 755–767.  
693 <https://doi.org/10.1016/j.freeradbiomed.2004.05.034>

- 694 3. Cai, J., Yang, J., Jones, DeanP., 1998. Mitochondrial control of apoptosis: the role of  
695 cytochrome c. *Biochimica et Biophysica Acta (BBA) - Bioenergetics* 1366, 139–149.  
696 [https://doi.org/10.1016/S0005-2728\(98\)00109-1](https://doi.org/10.1016/S0005-2728(98)00109-1)
- 697 4. Cantaert, T., Baeten, D., Tak, P.P., van Baarsen, L.G., 2010. Type I IFN and TNF $\alpha$  cross-  
698 regulation in immune-mediated inflammatory disease: basic concepts and clinical relevance.  
699 *Arthritis Research & Therapy* 12, 219. <https://doi.org/10.1186/ar3150>
- 700 5. Charavaryamath, C., Janardhan, K.S., Townsend, H.G., Willson, P., Singh, B., 2005. Multiple  
701 exposures to swine barn air induce lung inflammation and airway hyper-responsiveness.  
702 *Respiratory Research* 6, 50. <https://doi.org/10.1186/1465-9921-6-50>
- 703 6. Charavaryamath, C., Singh, B., 2006. Pulmonary effects of exposure to pig barn air. *J Occup  
704 Med Toxicol* 1, 10. <https://doi.org/10.1186/1745-6673-1-10>
- 705 7. CHAUNG, W.W., WU, R., JI, Y., DONG, W., WANG, P., 2012. Mitochondrial transcription  
706 factor A is a proinflammatory mediator in hemorrhagic shock. *Int J Mol Med* 30, 199–203.  
707 <https://doi.org/10.3892/ijmm.2012.959>
- 708 8. Chen, H., Detmer, S.A., Ewald, A.J., Griffin, E.E., Fraser, S.E., Chan, D.C., 2003. Mitofusins  
709 Mfn1 and Mfn2 coordinately regulate mitochondrial fusion and are essential for embryonic  
710 development. *J Cell Biol* 160, 189–200. <https://doi.org/10.1083/jcb.200211046>
- 711 9. Cloonan, S.M., Choi, A.M., 2012. Mitochondria: commanders of innate immunity and disease?  
712 *Current Opinion in Immunology, Innate immunity / Antigen processing* 24, 32–40.  
713 <https://doi.org/10.1016/j.coi.2011.11.001>
- 714 10. Cloonan, S.M., Choi, A.M.K., 2016. Mitochondria in lung disease. *J Clin Invest* 126, 809–820.  
715 <https://doi.org/10.1172/JCI81113>
- 716 11. Cole, D., Todd, L., Wing, S., 2000. Concentrated swine feeding operations and public health:  
717 a review of occupational and community health effects. *Environ Health Perspect* 108, 685–  
718 699.
- 719 12. Ding, W.-X., Yin, X.-M., 2012. Mitophagy: mechanisms, pathophysiological roles, and  
720 analysis. *Biol Chem* 393, 547–564. <https://doi.org/10.1515/hsz-2012-0119>
- 721 13. Eisner, V., Picard, M., Hajnóczy, G., 2018. Mitochondrial dynamics in adaptive and  
722 maladaptive cellular stress responses. *Nature Cell Biology* 20, 755–765.  
723 <https://doi.org/10.1038/s41556-018-0133-0>
- 724 14. Filadi, R., Pendin, D., Pizzo, P., 2018. Mitofusin 2: from functions to disease. *Cell Death Dis*  
725 9, 330. <https://doi.org/10.1038/s41419-017-0023-6>

- 726 15. Finkel, T., Menazza, S., Holmström, K.M., Parks, R.J., Liu, Julia, Sun, J., Liu, Jie, Pan, X.,  
727 Murphy, E., 2015. The Ins and Outs of Mitochondrial Calcium. *Circ Res* 116, 1810–1819.  
728 <https://doi.org/10.1161/CIRCRESAHA.116.305484>
- 729 16. Fukui, M., Zhu, B.T., 2010. Mitochondrial Superoxide Dismutase SOD2, but not Cytosolic  
730 SOD1, Plays a Critical Role in Protection against Glutamate-Induced Oxidative Stress and  
731 Cell Death in HT22 Neuronal Cells. *Free Radic Biol Med* 48, 821–830.  
732 <https://doi.org/10.1016/j.freeradbiomed.2009.12.024>
- 733 17. Garrido, C., Galluzzi, L., Brunet, M., Puig, P.E., Didelot, C., Kroemer, G., 2006. Mechanisms  
734 of cytochrome c release from mitochondria. *Cell Death & Differentiation* 13, 1423–1433.  
735 <https://doi.org/10.1038/sj.cdd.4401950>
- 736 18. Gdynia, G., Sauer, S.W., Kopitz, J., Fuchs, D., Duglova, K., Ruppert, T., Miller, M., Pahl, J.,  
737 Cerwenka, A., Enders, M., Mairbäurl, H., Kamiński, M.M., Penzel, R., Zhang, C., Fuller, J.C.,  
738 Wade, R.C., Benner, A., Chang-Claude, J., Brenner, H., Hoffmeister, M., Zentgraf, H.,  
739 Schirmacher, P., Roth, W., 2016. The HMGB1 protein induces a metabolic type of tumour cell  
740 death by blocking aerobic respiration. *Nature Communications* 7, 10764.  
741 <https://doi.org/10.1038/ncomms10764>
- 742 19. Ghosh, A., Langley, M.R., Harischandra, D.S., Neal, M.L., Jin, H., Anantharam, V., Joseph,  
743 J., Brenza, T., Narasimhan, B., Kanthasamy, A., Kalyanaraman, B., Kanthasamy, A.G., 2016.  
744 Mitoapocynin Treatment Protects Against Neuroinflammation and Dopaminergic  
745 Neurodegeneration in a Preclinical Animal Model of Parkinson's Disease. *J Neuroimmune*  
746 *Pharmacol* 11, 259–278. <https://doi.org/10.1007/s11481-016-9650-4>
- 747 20. Gong, Z., Pan, J., Shen, Q., Li, M., Peng, Y., 2018. Mitochondrial dysfunction induces NLRP3  
748 inflammasome activation during cerebral ischemia/reperfusion injury. *Journal of*  
749 *Neuroinflammation* 15, 242. <https://doi.org/10.1186/s12974-018-1282-6>
- 750 21. Gordon, R., Hogan, C.E., Neal, M.L., Anantharam, V., Kanthasamy, A.G., Kanthasamy, A.,  
751 2011. A simple magnetic separation method for high-yield isolation of pure primary microglia.  
752 *J. Neurosci. Methods* 194, 287–296. <https://doi.org/10.1016/j.jneumeth.2010.11.001>
- 753 22. Green, D.R., Kroemer, G., 2004. The Pathophysiology of Mitochondrial Cell Death. *Science*  
754 305, 626–629. <https://doi.org/10.1126/science.1099320>
- 755 23. Huang, H., Hu, X., Eno, C.O., Zhao, G., Li, C., White, C., 2013. An Interaction between Bcl-  
756 xL and the Voltage-dependent Anion Channel (VDAC) Promotes Mitochondrial Ca<sup>2+</sup> Uptake.  
757 *J. Biol. Chem.* 288, 19870–19881. <https://doi.org/10.1074/jbc.M112.448290>
- 758 24. Huang, H., Shah, K., Bradbury, N.A., Li, C., White, C., 2014. Mcl-1 promotes lung cancer cell  
759 migration by directly interacting with VDAC to increase mitochondrial Ca<sup>2+</sup> uptake and



- 760 reactive oxygen species generation. *Cell Death & Disease* 5, e1482–e1482.  
761 <https://doi.org/10.1038/cddis.2014.419>
- 762 25. Hunter, D.R., Haworth, R.A., Southard, J.H., 1976. Relationship between configuration,  
763 function, and permeability in calcium-treated mitochondria. *J. Biol. Chem.* 251, 5069–5077.
- 764 26. Hüttemann, M., Lee, I., Gao, X., Pecina, P., Pecinova, A., Liu, J., Aras, S., Sommer, N.,  
765 Sanderson, T.H., Tost, M., Neff, F., Aguilar-Pimentel, J.A., Becker, L., Naton, B., Rathkolb,  
766 B., Rozman, J., Favor, J., Hans, W., Prehn, C., Puk, O., Schrewe, A., Sun, M., Höfler, H.,  
767 Adamski, J., Bekeredian, R., Graw, J., Adler, T., Busch, D.H., Klingenspor, M., Klopstock, T.,  
768 Ollert, M., Wolf, E., Fuchs, H., Gailus-Durner, V., Angelis, M.H. de, Weissmann, N., Doan,  
769 J.W., Bassett, D.J.P., Grossman, L.I., 2012. Cytochrome c oxidase subunit 4 isoform 2-  
770 knockout mice show reduced enzyme activity, airway hyporeactivity, and lung pathology. *The*  
771 *FASEB Journal* 26, 3916–3930. <https://doi.org/10.1096/fj.11-203273>
- 772 27. Hyun, H.-W., Ko, A.-R., Kang, T.-C., 2016. Mitochondrial Translocation of High Mobility Group  
773 Box 1 Facilitates LIM Kinase 2-Mediated Programmed Necrotic Neuronal Death. *Front Cell*  
774 *Neurosci* 10. <https://doi.org/10.3389/fncel.2016.00099>
- 775 28. Ishihara, Y., Takemoto, T., Itoh, K., Ishida, A., Yamazaki, T., 2015. Dual Role of Superoxide  
776 Dismutase 2 Induced in Activated Microglia OXIDATIVE STRESS TOLERANCE AND  
777 CONVERGENCE OF INFLAMMATORY RESPONSES. *J. Biol. Chem.* 290, 22805–22817.  
778 <https://doi.org/10.1074/jbc.M115.659151>
- 779 29. Jouaville, L.S., Pinton, P., Bastianutto, C., Rutter, G.A., Rizzuto, R., 1999. Regulation of  
780 mitochondrial ATP synthesis by calcium: Evidence for a long-term metabolic priming. *PNAS*  
781 96, 13807–13812. <https://doi.org/10.1073/pnas.96.24.13807>
- 782 30. Julian, M.W., Shao, G., Bao, S., Knoell, D.L., Papenfuss, T.L., VanGundy, Z.C., Crouser, E.D.,  
783 2012. Mitochondrial Transcription Factor A Serves as a Danger Signal by Augmenting  
784 Plasmacytoid Dendritic Cell Responses to DNA. *The Journal of Immunology* 189, 433–443.  
785 <https://doi.org/10.4049/jimmunol.1101375>
- 786 31. Julian, M.W., Shao, G., Vangundy, Z.C., Papenfuss, T.L., Crouser, E.D., 2013. Mitochondrial  
787 transcription factor A, an endogenous danger signal, promotes TNF $\alpha$  release via RAGE- and  
788 TLR9-responsive plasmacytoid dendritic cells. *PLoS ONE* 8, e72354.  
789 <https://doi.org/10.1371/journal.pone.0072354>
- 790 32. Kelly, B., O'Neill, L.A., 2015. Metabolic reprogramming in macrophages and dendritic cells in  
791 innate immunity. *Cell Research* 25, 771–784. <https://doi.org/10.1038/cr.2015.68>
- 792 33. Kim, H.S., Cho, I.H., Kim, J.E., Shin, Y.J., Jeon, J.-H., Kim, Y., Yang, Y.M., Lee, K.-H., Lee,  
793 J.W., Lee, W.-J., Ye, S.-K., Chung, M.-H., 2008. Ethyl pyruvate has an anti-inflammatory effect

- 794 by inhibiting ROS-dependent STAT signaling in activated microglia. *Free Radic. Biol. Med.*  
795 45, 950–963. <https://doi.org/10.1016/j.freeradbiomed.2008.06.009>
- 796 34. Kim, J.-Y., Cho, J.-J., Ha, J., Park, J.-H., 2002. The Carboxy Terminal C-Tail of BNip3 Is  
797 Crucial in Induction of Mitochondrial Permeability Transition in Isolated Mitochondria. *Archives*  
798 *of Biochemistry and Biophysics* 398, 147–152. <https://doi.org/10.1006/abbi.2001.2673>
- 799 35. Kim, R., 2005. Unknotting the roles of Bcl-2 and Bcl-xL in cell death. *Biochemical and*  
800 *Biophysical Research Communications* 333, 336–343.  
801 <https://doi.org/10.1016/j.bbrc.2005.04.161>
- 802 36. Krysko, D.V., Denecker, G., Festjens, N., Gabriels, S., Parthoens, E., D'Herde, K.,  
803 Vandenameele, P., 2006. Macrophages use different internalization mechanisms to clear  
804 apoptotic and necrotic cells. *Cell Death & Differentiation* 13, 2011–2022.  
805 <https://doi.org/10.1038/sj.cdd.4401900>
- 806 37. Landes, T., Emorine, L.J., Courilleau, D., Rojo, M., Belenguer, P., Arnauné-Pelloquin, L.,  
807 2010. The BH3-only Bnip3 binds to the dynamin Opa1 to promote mitochondrial fragmentation  
808 and apoptosis by distinct mechanisms. *EMBO reports* 11, 459–465.  
809 <https://doi.org/10.1038/embor.2010.50>
- 810 38. Langley, M., Ghosh, A., Charli, A., Sarkar, S., Ay, M., Luo, J., Zielonka, J., Brenza, T., Bennett,  
811 B., Jin, H., Ghaisas, S., Schlichtmann, B., Kim, D., Anantharam, V., Kanthasamy, A.,  
812 Narasimhan, B., Kalyanaraman, B., Kanthasamy, A.G., 2017. Mito-Apocynin Prevents  
813 Mitochondrial Dysfunction, Microglial Activation, Oxidative Damage, and Progressive  
814 Neurodegeneration in MitoPark Transgenic Mice. *Antioxidants & Redox Signaling* 27, 1048–  
815 1066. <https://doi.org/10.1089/ars.2016.6905>
- 816 39. Latchoumycandane, C., Anantharam, V., Kitazawa, M., Yang, Y., Kanthasamy, A.,  
817 Kanthasamy, A.G., 2005. Protein kinase Cdelta is a key downstream mediator of manganese-  
818 induced apoptosis in dopaminergic neuronal cells. *J. Pharmacol. Exp. Ther.* 313, 46–55.  
819 <https://doi.org/10.1124/jpet.104.078469>
- 820 40. Liu, J., Fang, H., Chi, Z., Wu, Z., Wei, D., Mo, D., Niu, K., Balajee, A.S., Hei, T.K., Nie, L.,  
821 Zhao, Y., 2015. XPD localizes in mitochondria and protects the mitochondrial genome from  
822 oxidative DNA damage. *Nucleic Acids Res* 43, 5476–5488.  
823 <https://doi.org/10.1093/nar/gkv472>
- 824 41. Livak, K.J., Schmittgen, T.D., 2001. Analysis of Relative Gene Expression Data Using Real-  
825 Time Quantitative PCR and the 2- $\Delta\Delta$ CT Method. *Methods* 25, 402–408.  
826 <https://doi.org/10.1006/meth.2001.1262>

- 827 42. Maiuri, M.C., Le Toumelin, G., Criollo, A., Rain, J.-C., Gautier, F., Juin, P., Tasdemir, E.,  
828 Pierron, G., Troulinaki, K., Tavernarakis, N., Hickman, J.A., Geneste, O., Kroemer, G., 2007.  
829 Functional and physical interaction between Bcl-XL and a BH3-like domain in Beclin-1. *The*  
830 *EMBO Journal* 26, 2527–2539. <https://doi.org/10.1038/sj.emboj.7601689>
- 831 43. Milde, R., Ritter, J., Tennent, G.A., Loesch, A., Martinez, F.O., Gordon, S., Pepys, M.B.,  
832 Verschoor, A., Helming, L., 2015. Multinucleated Giant Cells Are Specialized for Complement-  
833 Mediated Phagocytosis and Large Target Destruction. *Cell Rep* 13, 1937–1948.  
834 <https://doi.org/10.1016/j.celrep.2015.10.065>
- 835 44. Miron, R.J., Bosshardt, D.D., 2017. Multinucleated Giant Cells: Good Guys or Bad Guys?  
836 *Tissue Engineering Part B: Reviews* 24, 53–65. <https://doi.org/10.1089/ten.teb.2017.0242>
- 837 45. Mishra, P., Chan, D.C., 2014. Mitochondrial dynamics and inheritance during cell division,  
838 development and disease. *Nature Reviews Molecular Cell Biology* 15, 634–646.  
839 <https://doi.org/10.1038/nrm3877>
- 840 46. Murakami, T., Ockinger, J., Yu, J., Byles, V., McColl, A., Hofer, A.M., Horng, T., 2012. Critical  
841 role for calcium mobilization in activation of the NLRP3 inflammasome. *Proc. Natl. Acad. Sci.*  
842 *U.S.A.* 109, 11282–11287. <https://doi.org/10.1073/pnas.1117765109>
- 843 47. Nakahira, K., Haspel, J.A., Rathinam, V.A.K., Lee, S.-J., Dolinay, T., Lam, H.C., Englert, J.A.,  
844 Rabinovitch, M., Cernadas, M., Kim, H.P., Fitzgerald, K.A., Ryter, S.W., Choi, A.M.K., 2011.  
845 Autophagy proteins regulate innate immune responses by inhibiting the release of  
846 mitochondrial DNA mediated by the NALP3 inflammasome. *Nature Immunology* 12, 222–230.  
847 <https://doi.org/10.1038/ni.1980>
- 848 48. Narendra, D., Kane, L.A., Hauser, D.N., Fearnley, I.M., Youle, R.J., 2010. p62/SQSTM1 is  
849 required for Parkin-induced mitochondrial clustering but not mitophagy; VDAC1 is dispensable  
850 for both. *Autophagy* 6, 1090–1106. <https://doi.org/10.4161/auto.6.8.13426>
- 851 49. Narendra, D., Tanaka, A., Suen, D.-F., Youle, R.J., 2008. Parkin is recruited selectively to  
852 impaired mitochondria and promotes their autophagy. *J Cell Biol* 183, 795–803.  
853 <https://doi.org/10.1083/jcb.200809125>
- 854 50. Narendra, D.P., Jin, S.M., Tanaka, A., Suen, D.-F., Gautier, C.A., Shen, J., Cookson, M.R.,  
855 Youle, R.J., 2010. PINK1 Is Selectively Stabilized on Impaired Mitochondria to Activate Parkin.  
856 *PLOS Biology* 8, e1000298. <https://doi.org/10.1371/journal.pbio.1000298>
- 857 51. Nath Neerukonda, S., Mahadev-Bhat, S., Aylward, B., Johnson, C., Charavaryamath, C.,  
858 Arsenault, R.J., 2018. Kinome analyses of inflammatory responses to swine barn dust extract  
859 in human bronchial epithelial and monocyte cell lines. *Innate Immun* 24, 366–381.  
860 <https://doi.org/10.1177/1753425918792070>

- 861 52. Ney, P.A., 2015. Mitochondrial autophagy: Origins, significance, and role of BNIP3 and NIX.  
862 Biochimica et Biophysica Acta (BBA) - Molecular Cell Research, Mitophagy 1853, 2775–2783.  
863 <https://doi.org/10.1016/j.bbamcr.2015.02.022>
- 864 53. Nordgren, T.M., Charavaryamath, C., 2018. Agriculture Occupational Exposures and Factors  
865 Affecting Health Effects. *Curr Allergy Asthma Rep* 18, 65. [https://doi.org/10.1007/s11882-018-](https://doi.org/10.1007/s11882-018-0820-8)  
866 0820-8
- 867 54. Nugent, S.M.E., Mothersill, C.E., Seymour, C., McClean, B., Lyng, F.M., Murphy, J.E.J., 2007.  
868 Increased Mitochondrial Mass in Cells with Functionally Compromised Mitochondria after  
869 Exposure to both Direct  $\gamma$  Radiation and Bystander Factors. *rare* 168, 134–142.  
870 <https://doi.org/10.1667/RR0769.1>
- 871 55. Ott, M., Robertson, J.D., Gogvadze, V., Zhivotovsky, B., Orrenius, S., 2002. Cytochrome c  
872 release from mitochondria proceeds by a two-step process. *PNAS* 99, 1259–1263.  
873 <https://doi.org/10.1073/pnas.241655498>
- 874 56. Pagliarini, D.J., Rutter, J., 2013. Hallmarks of a new era in mitochondrial biochemistry. *Genes*  
875 *Dev.* 27, 2615–2627. <https://doi.org/10.1101/gad.229724.113>
- 876 57. Parisi, M.A., Clayton, D.A., 1991. Similarity of human mitochondrial transcription factor 1 to  
877 high mobility group proteins. *Science* 252, 965–969. <https://doi.org/10.1126/science.2035027>
- 878 58. Pattingre, S., Tassa, A., Qu, X., Garuti, R., Liang, X.H., Mizushima, N., Packer, M., Schneider,  
879 M.D., Levine, B., 2005. Bcl-2 Antiapoptotic Proteins Inhibit Beclin 1-Dependent Autophagy.  
880 *Cell* 122, 927–939. <https://doi.org/10.1016/j.cell.2005.07.002>
- 881 59. Picard, M., White, K., Turnbull, D.M., 2013. Mitochondrial morphology, topology, and  
882 membrane interactions in skeletal muscle: a quantitative three-dimensional electron  
883 microscopy study. *J Appl Physiol* (1985) 114, 161–171.  
884 <https://doi.org/10.1152/jappphysiol.01096.2012>
- 885 60. Pitter, J.G., Maechler, P., Wollheim, C.B., Spät, A., 2002. Mitochondria respond to  $\text{Ca}^{2+}$   
886 already in the submicromolar range: correlation with redox state. *Cell Calcium* 31, 97–104.  
887 <https://doi.org/10.1054/ceca.2001.0264>
- 888 61. Qi, L., Sun, X., Li, F.-E., Zhu, B.-S., Braun, F.K., Liu, Z.-Q., Tang, J.-L., Wu, C., Xu, F., Wang,  
889 H.-H., Velasquez, L.A., Zhao, K., Lei, F.-R., Zhang, J.-G., Shen, Y.-T., Zou, J.-X., Meng, H.-  
890 M., An, G.-L., Yang, L., Zhang, X.-D., 2015. HMGB1 Promotes Mitochondrial Dysfunction–  
891 Triggered Striatal Neurodegeneration via Autophagy and Apoptosis Activation. *PLoS One* 10.  
892 <https://doi.org/10.1371/journal.pone.0142901>
- 893 62. Quinsay, M.N., Lee, Y., Rikka, S., Sayen, M.R., Molkenin, J.D., Gottlieb, R.A., Gustafsson,  
894 Å.B., 2010. Bnip3 mediates permeabilization of mitochondria and release of cytochrome c via

- 895 a novel mechanism. *Journal of Molecular and Cellular Cardiology* 48, 1146–1156.  
896 <https://doi.org/10.1016/j.yjmcc.2009.12.004>
- 897 63. Redondo-Horcajo, M., Romero, N., Martínez-Acedo, P., Martínez-Ruiz, A., Quijano, C.,  
898 Lourenço, C.F., Movilla, N., Enríquez, J.A., Rodríguez-Pascual, F., Rial, E., Radi, R.,  
899 Vázquez, J., Lamas, S., 2010. Cyclosporine A-induced nitration of tyrosine 34 MnSOD in  
900 endothelial cells: role of mitochondrial superoxide. *Cardiovasc. Res.* 87, 356–365.  
901 <https://doi.org/10.1093/cvr/cvq028>
- 902 64. Respiratory Health Hazards in Agriculture, 1998. . *Am J Respir Crit Care Med* 158, S1–S76.  
903 [https://doi.org/10.1164/ajrccm.158.supplement\\_1.rccm1585s1](https://doi.org/10.1164/ajrccm.158.supplement_1.rccm1585s1)
- 904 65. Rikka, S., Quinsay, M.N., Thomas, R.L., Kubli, D.A., Zhang, X., Murphy, A.N., Gustafsson,  
905 Å.B., 2011. Bnip3 impairs mitochondrial bioenergetics and stimulates mitochondrial turnover.  
906 *Cell Death & Differentiation* 18, 721–731. <https://doi.org/10.1038/cdd.2010.146>
- 907 66. Romberger, D.J., Bodlak, V., Von Essen, S.G., Mathisen, T., Wyatt, T.A., 2002. Hog barn dust  
908 extract stimulates IL-8 and IL-6 release in human bronchial epithelial cells via PKC activation.  
909 *Journal of Applied Physiology* 93, 289–296. <https://doi.org/10.1152/jappphysiol.00815.2001>
- 910 67. Sahlander, K., Larsson, K., Palmberg, L., 2012. Daily exposure to dust alters innate immunity.  
911 *PLoS ONE* 7, e31646. <https://doi.org/10.1371/journal.pone.0031646>
- 912 68. Senthilselvan, A., Zhang, Y., Dosman, J.A., Barber, E.M., Holfeld, L.E., Kirychuk, S.P.,  
913 Cormier, Y., Hurst, T.S., Rhodes, C.S., 1997. Positive human health effects of dust  
914 suppression with canola oil in swine barns. *Am. J. Respir. Crit. Care Med.* 156, 410–417.  
915 <https://doi.org/10.1164/ajrccm.156.2.9612069>
- 916 69. Sethi, R.S., Schneberger, D., Charavaryamath, C., Singh, B., 2017. Pulmonary innate  
917 inflammatory responses to agricultural occupational contaminants. *Cell Tissue Res.* 367, 627–  
918 642. <https://doi.org/10.1007/s00441-017-2573-4>
- 919 70. Stefanska, J., Pawliczak, R., 2008. Apocynin: Molecular Aptitudes. *Mediators of Inflammation*  
920 2008, 1–10. <https://doi.org/10.1155/2008/106507>
- 921 71. Stumbo, A.C., Cortez, E., Rodrigues, C.A., Henriques, M. das G.M.O., Porto, L.C., Barbosa,  
922 H.S., Carvalho, L., 2008. Mitochondrial localization of non-histone protein HMGB1 during  
923 human endothelial cell–*Toxoplasma gondii* infection. *Cell Biology International* 32, 235–238.  
924 <https://doi.org/10.1016/j.cellbi.2007.08.031>
- 925 72. Tang, D., Kang, R., Livesey, K.M., Kroemer, G., Billiar, T.R., Van Houten, B., Zeh, H.J., Lotze,  
926 M.T., 2011. High-Mobility Group Box 1 Is Essential for Mitochondrial Quality Control. *Cell*  
927 *Metabolism* 13, 701–711. <https://doi.org/10.1016/j.cmet.2011.04.008>

- 928 73. Tilokani, L., Nagashima, S., Paupe, V., Prudent, J., 2018. Mitochondrial dynamics: overview  
929 of molecular mechanisms. *Essays Biochem* 62, 341–360.  
930 <https://doi.org/10.1042/EBC20170104>
- 931 74. Velde, C.V., Cizeau, J., Dubik, D., Alimonti, J., Brown, T., Israels, S., Hakem, R., Greenberg,  
932 A.H., 2000. BNIP3 and Genetic Control of Necrosis-Like Cell Death through the Mitochondrial  
933 Permeability Transition Pore. *Molecular and Cellular Biology* 20, 5454–5468.  
934 <https://doi.org/10.1128/MCB.20.15.5454-5468.2000>
- 935 75. Venkataraman, R., Kellum, J.A., Song, M., Fink, M.P., 2002. Resuscitation with Ringer’s ethyl  
936 pyruvate solution prolongs survival and modulates plasma cytokine and nitrite/nitrate  
937 concentrations in a rat model of lipopolysaccharide-induced shock. *Shock* 18, 507–512.  
938 <https://doi.org/10.1097/00024382-200212000-00004>
- 939 76. Vested, A., Basinas, I., Burdorf, A., Elholm, G., Heederik, D.J.J., Jacobsen, G.H., Kolstad,  
940 H.A., Kromhout, H., Omland, Ø., Sigsgaard, T., Thulstrup, A.M., Toft, G., Vestergaard, J.M.,  
941 Wouters, I.M., Schlünssen, V., 2019. A nationwide follow-up study of occupational organic  
942 dust exposure and risk of chronic obstructive pulmonary disease (COPD). *Occup Environ Med*  
943 76, 105–113. <https://doi.org/10.1136/oemed-2018-105323>
- 944 77. Wai, T., Langer, T., 2016. Mitochondrial Dynamics and Metabolic Regulation. *Trends in*  
945 *Endocrinology & Metabolism* 27, 105–117. <https://doi.org/10.1016/j.tem.2015.12.001>
- 946 78. West, A.P., Khoury-Hanold, W., Staron, M., Tal, M.C., Pineda, C.M., Lang, S.M., Bestwick,  
947 M., Duguay, B.A., Raimundo, N., MacDuff, D.A., Kaech, S.M., Smiley, J.R., Means, R.E.,  
948 Iwasaki, A., Shadel, G.S., 2015. Mitochondrial DNA stress primes the antiviral innate immune  
949 response. *Nature* 520, 553–557. <https://doi.org/10.1038/nature14156>
- 950 79. Wunschel, J., Poole, J.A., 2016. Occupational agriculture organic dust exposure and its  
951 relationship to asthma and airway inflammation in adults. *J Asthma* 53, 471–477.  
952 <https://doi.org/10.3109/02770903.2015.1116089>
- 953 80. Yu, J., Nagasu, H., Murakami, T., Hoang, H., Broderick, L., Hoffman, H.M., Horng, T., 2014.  
954 Inflammasome activation leads to Caspase-1–dependent mitochondrial damage and block of  
955 mitophagy. *Proc Natl Acad Sci U S A* 111, 15514–15519.  
956 <https://doi.org/10.1073/pnas.1414859111>
- 957 81. Yu, Y.-M., Kim, J.-B., Lee, K.-W., Kim, S.Y., Han, P.-L., Lee, J.-K., 2005. Inhibition of the  
958 cerebral ischemic injury by ethyl pyruvate with a wide therapeutic window. *Stroke* 36, 2238–  
959 2243. <https://doi.org/10.1161/01.STR.0000181779.83472.35>

- 960 82. Zhang, Q., Raouf, M., Chen, Y., Sumi, Y., Sursal, T., Junger, W., Brohi, K., Itagaki, K., Hauser,  
961 C.J., 2010. Circulating mitochondrial DAMPs cause inflammatory responses to injury. *Nature*  
962 464, 104–107. <https://doi.org/10.1038/nature08780>
- 963 83. Zorov, D.B., Juhaszova, M., Sollott, S.J., 2014. Mitochondrial Reactive Oxygen Species  
964 (ROS) and ROS-Induced ROS Release. *Physiol Rev* 94, 909–950.  
965 <https://doi.org/10.1152/physrev.00026.2013>

966

967

968

969

970

971

972

973

974

975

976

977

978

979

980

981

982

983

984

985

986 **Figures and Legends**

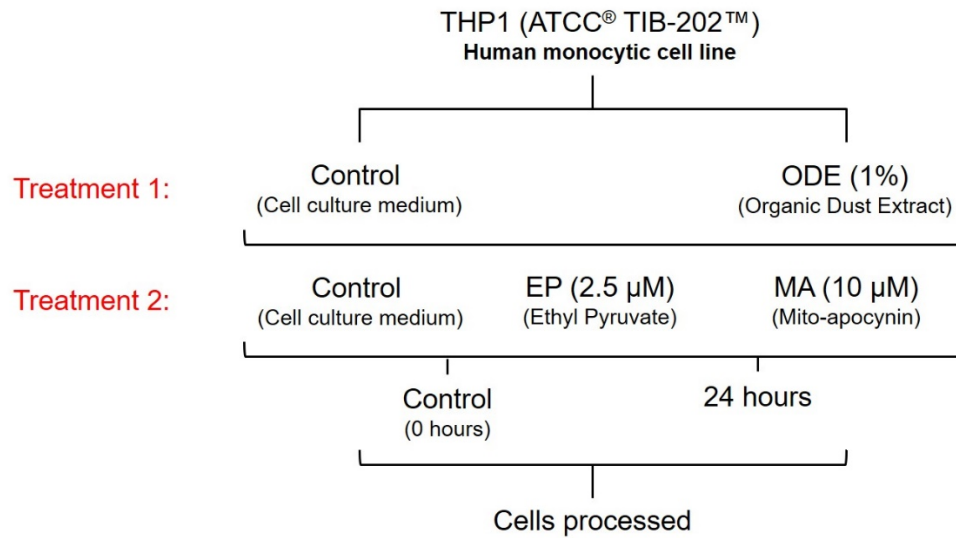

987

988 **Figure 1. ODE exposure of THP1 cells and antioxidant treatment.** THP1 cells were treated  
989 with either media (control) or ODE (treatment 1) followed by either media, EP or MA (treatment  
990 2). Cells were processed for various assays at 0 (control), and 24 hours.

991

992

993

994

995

996

997



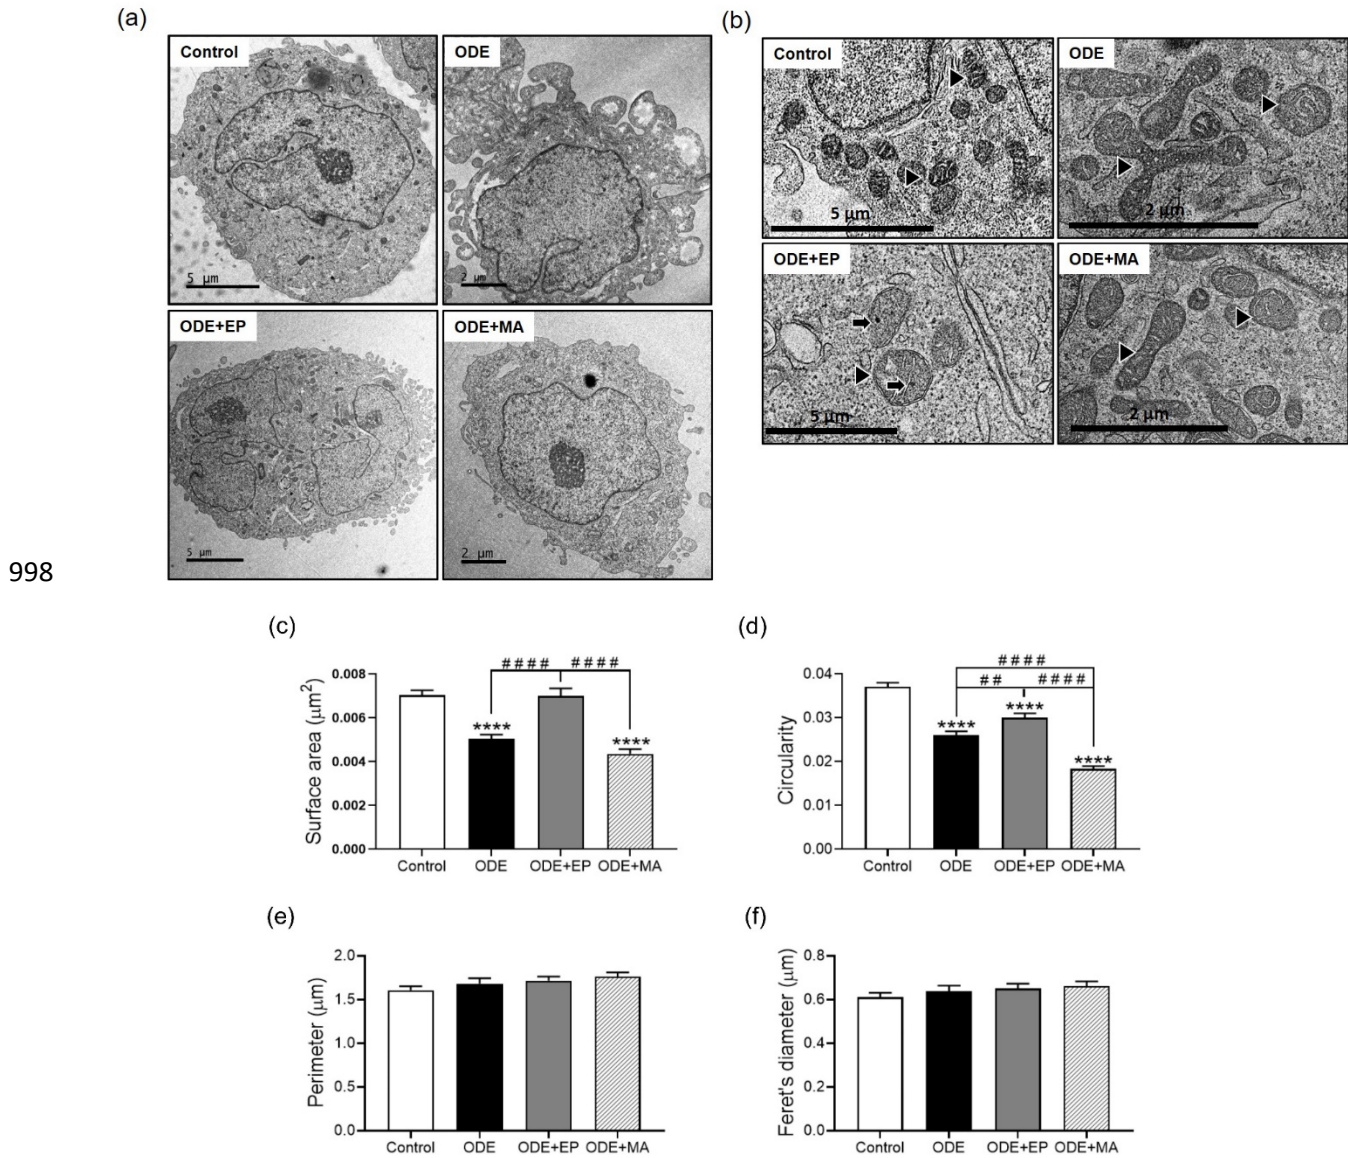

1000 **Figure 2. ODE exposure induces differentiation of THP1 cells and changes in mitochondrial**  
1001 **morphology.** Transmission electron microscopy (TEM) of THP1 cells treated with ODE and  
1002 antioxidant therapy for 24 hours shows changes in cellular and mitochondrial morphology at the  
1003 ultrastructural level. Compared to controls, cells undergo differentiation into activated  
1004 macrophages, with increased vacuolation and pseudopod formation on treatment with ODE (1%;  
1005 a). Scale bar, 2-5 μm. A number of mitochondria show changes in morphology (fission/fusion)  
1006 and swelling (b), along with presence of calcium sequestration bodies within the mitochondrial  
1007 matrix in cells co-treated with 2.5 μM of EP, and noticeably healthier mitochondria with some  
1008 morphological changes (fission/fusion) in cells co-treated with 10 μM of MA. Morphological  
1009 parameters of mitochondria on treatment was analyzed by ImageJ (c-f). Significant change in the

1010 surface area (c) and circularity (d) indicative of mitochondrial fragmentation, and no change in  
 1011 perimeter (e) and the feret's diameter (f). Data analyzed via one-way ANOVA with Tukey's  
 1012 multiple comparison test, # or \* $p < 0.05$ , ## or \*\* $p < 0.01$ , ### or \*\*\* $p < 0.001$ , #### or \*\*\*\* $p < 0.001$  and  
 1013 are represented as Mean  $\pm$  SEM with  $n = 126$  mitochondria/treatment.

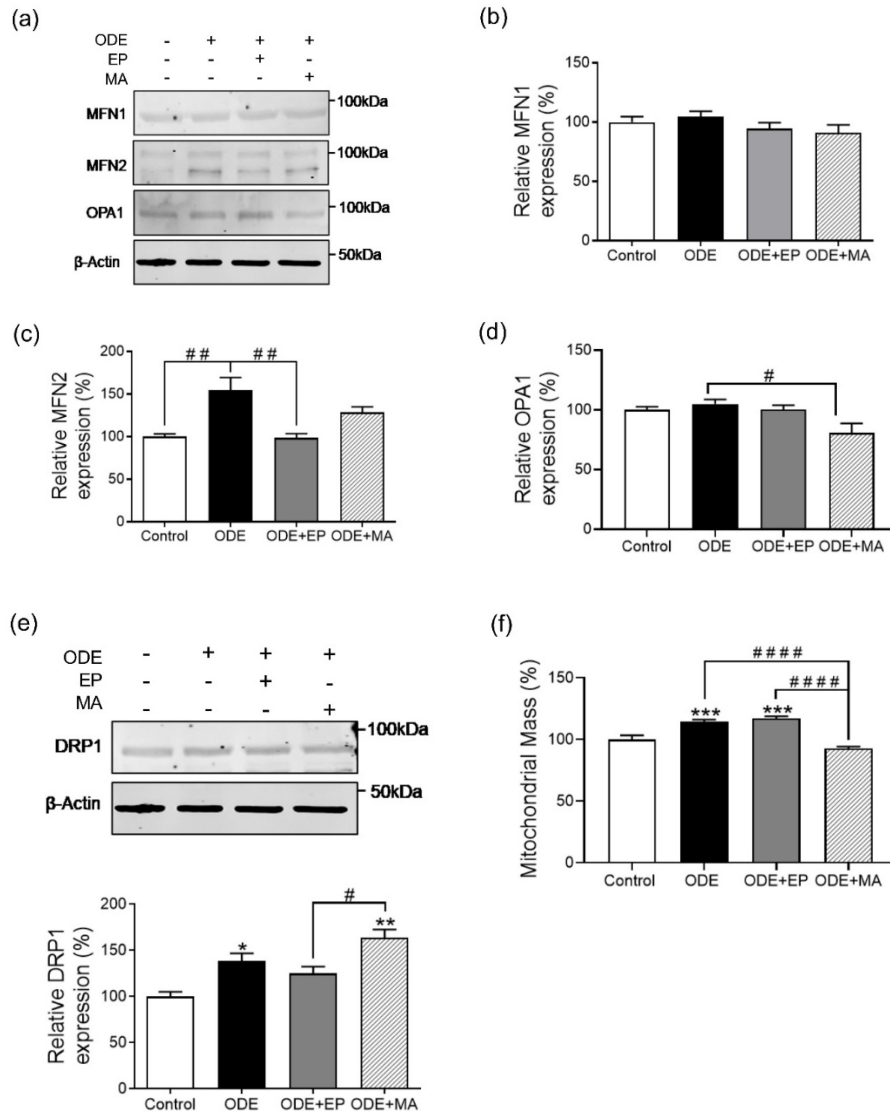

1014

1015

1016 **Figure 3. ODE exposure induces fusion of mitochondria in response to stress.**

1017 Immunoblotting of whole cell lysates of THP1 cells, treated with ODE and antioxidant therapy for  
 1018 24 hours, was performed to detect mitochondrial fusion and fission proteins. Compared to  
 1019 controls, ODE (1%) treated cells showed minimal changes in the expression of MFN1/2 and OPA1  
 1020 (a-d), while OPA1 expressions is significantly decreased on exposure to 10  $\mu$ M of MA. ODE  
 1021 treated cells showed an increase in DRP1 expression, whereas co-treatment with 10  $\mu$ M of MA,

1022 significantly upregulates DRP 1 expression and co-treatment with 2.5  $\mu$ M of EP downregulates  
 1023 DRP1 comparable to control (e). Mitochondrial mass was measured by Mito-Tracker staining and  
 1024 data showed a significant increase in the mass with ODE (1%) treatment, while 10  $\mu$ M of MA  
 1025 significantly reduced the mitochondrial mass to the baseline (control) levels (f). For all western  
 1026 blots, samples were derived from the same experiment and were processed in parallel. All protein  
 1027 bands were normalized over  $\beta$ -actin (37 kD) and percentage intensity relative to control analyzed.  
 1028 All data analyzed via one-way ANOVA with Tukey's multiple comparison test, # or \* $p < 0.05$ , ## or  
 1029 \*\* $p < 0.01$ , ### or \*\*\* $p < 0.001$ , #### or \*\*\*\* $p < 0.001$  and are represented as Mean  $\pm$  SEM with n =  
 1030 3-6/treatment.

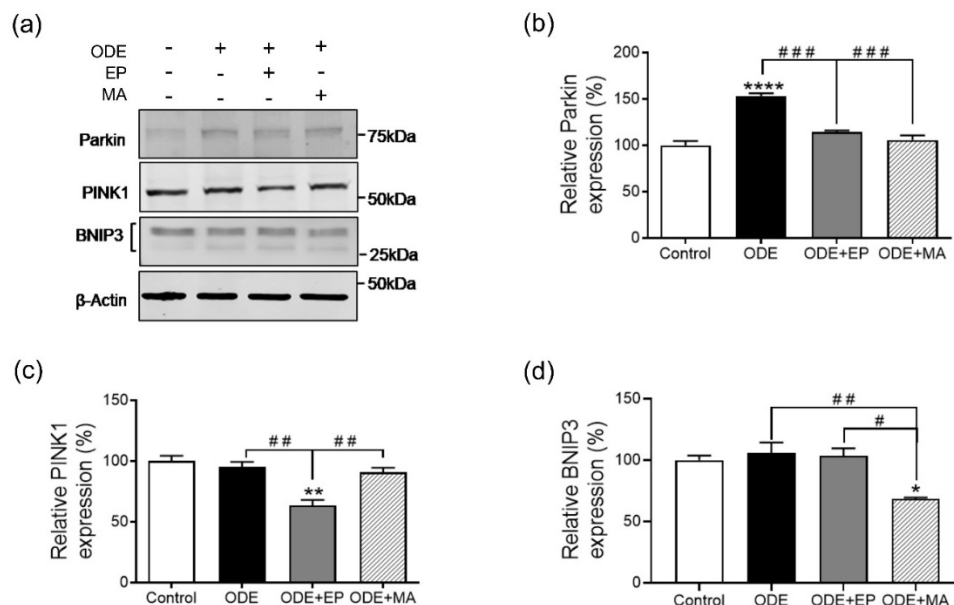

1031

1032 **Figure 4. ODE exposure induces selective targeting of mitochondria for autophagy**  
 1033 **(mitophagy).** Immunoblotting of whole cell lysates of THP1 cells, treated with ODE and  
 1034 antioxidant therapy for 24 hours, was performed to detect expression of mitophagy markers.  
 1035 Compared to controls, cells treated with ODE (1%) showed increase in the expression of Parkin  
 1036 (a-b), while expression of PINK1 remains relatively constant (c). Co-treatment with 10  $\mu$ M of MA  
 1037 significantly decreased Parkin and BNIP3 expressions (b & d). Co-treatment with 2.5  $\mu$ M of EP  
 1038 significantly decreased PINK1 and Parkin expressions, while having no impact on BNIP3 (a-d).  
 1039 For all western blots, samples were derived from the same experiment and were processed in  
 1040 parallel. All protein bands were normalized over  $\beta$ -actin (37 kD) and percentage intensity relative  
 1041 to control analyzed. All data analyzed via one-way ANOVA with Tukey's multiple comparison test,

1042 # or \* $p < 0.05$ , ## or \*\* $p < 0.01$ , ### or \*\*\* $p < 0.001$ , #### or \*\*\*\* $p < 0.001$  and are represented as Mean  
 1043  $\pm$  SEM with  $n = 3$ /treatment.

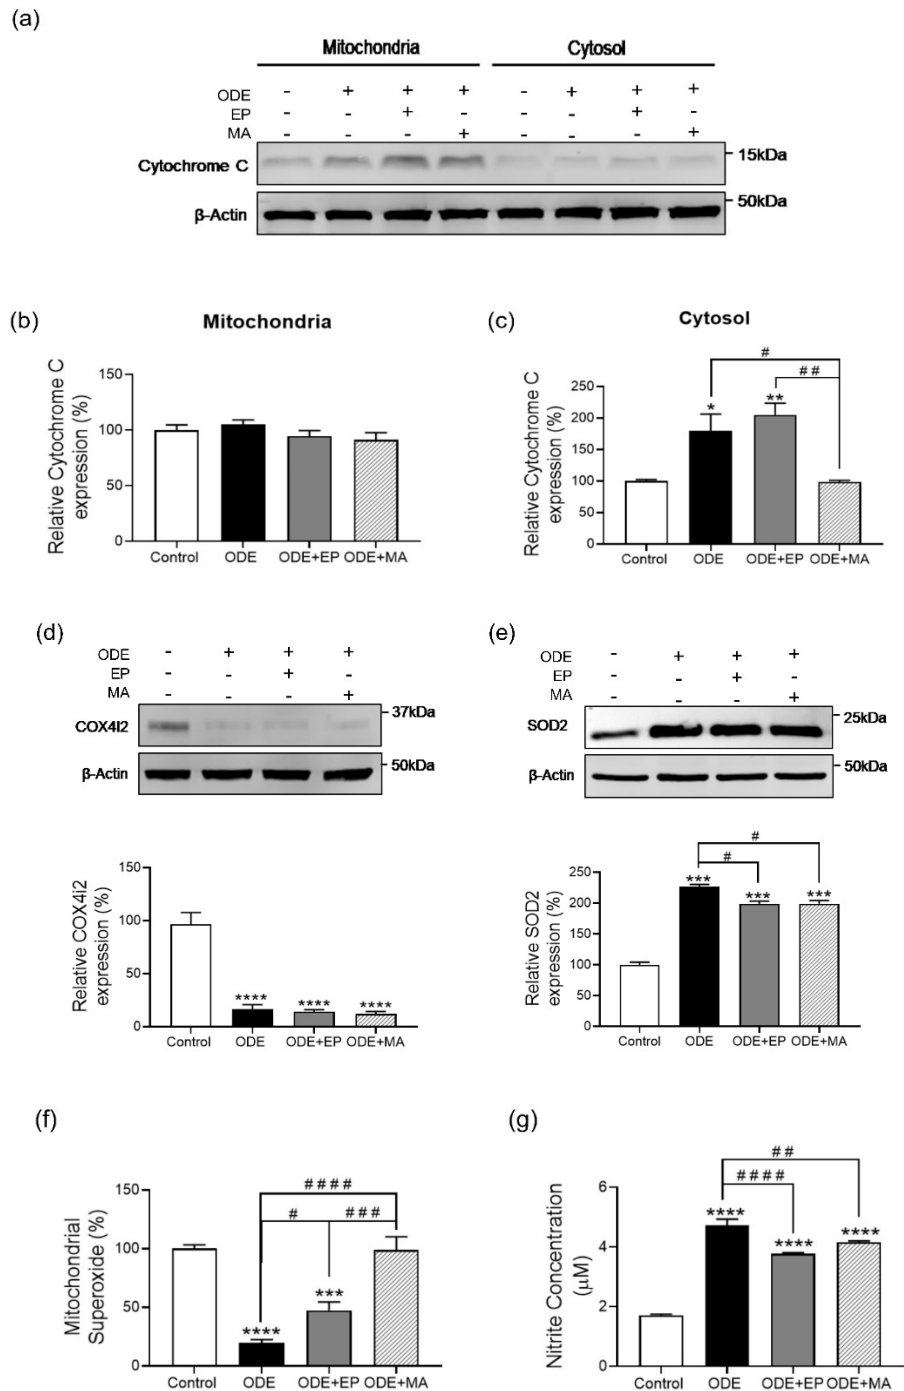

1044

1045

1046

1047 **Figure 5. Mitoapocyanin treatment decreases ODE-induced Cytochrome C release and**  
 1048 **markedly increases SOD2 expression in the cytosol.** Immunoblotting of mitochondrial and  
 1049 mitochondria-free cytosolic fractions of THP1 cells, treated with ODE and antioxidant therapy for

1050 24 hours, was performed to detect the presence of Cytochrome C and expression of lung-specific  
1051 isoform of COX, COX4i2, on ODE exposure. ODE (1%) and 2.5  $\mu$ M of EP co-treated cells showed  
1052 a significant increase in Cytochrome C in the cytosol (a & c), while treatment with 10  $\mu$ M of MA  
1053 downregulated Cytochrome C comparable to control (c). No change in levels of mitochondrial  
1054 Cytochrome C was observed for all treatments (b). ODE (1%) treated cells showed a significant  
1055 decrease in COX4i2 expression (d), while superoxide dismutase 2 (SOD2) increased compared  
1056 to controls and abrogated when treated with 10  $\mu$ M of MA and 2.5  $\mu$ M of EP (e). MitoSOX assay  
1057 performed showed a decrease in superoxide anions (SOX) on ODE (1%) exposure, while levels  
1058 on treatment with treated with 10  $\mu$ M of MA was comparable to control (f). Griess assay was  
1059 performed to measure the amount of nitrite levels secreted. ODE (1%) treated cells were  
1060 observed to secrete elevated levels of nitrite (g). Co-treatment with 2.5  $\mu$ M of EP or 10  $\mu$ M of MA  
1061 decreased nitrite levels. For all western blots, samples were derived from the same experiment  
1062 and were processed in parallel. All protein bands were normalized over  $\beta$ -actin (37 kD) and  
1063 percentage intensity relative to control analyzed. All data analyzed via one-way ANOVA with  
1064 Tukey's multiple comparison test, # or \*p < 0.05, ## or \*\*p < 0.01, ### or \*\*\*p < 0.001, #### or \*\*\*\*p <  
1065 0.001 and are represented as Mean  $\pm$  SEM with n = 3-6/treatment.

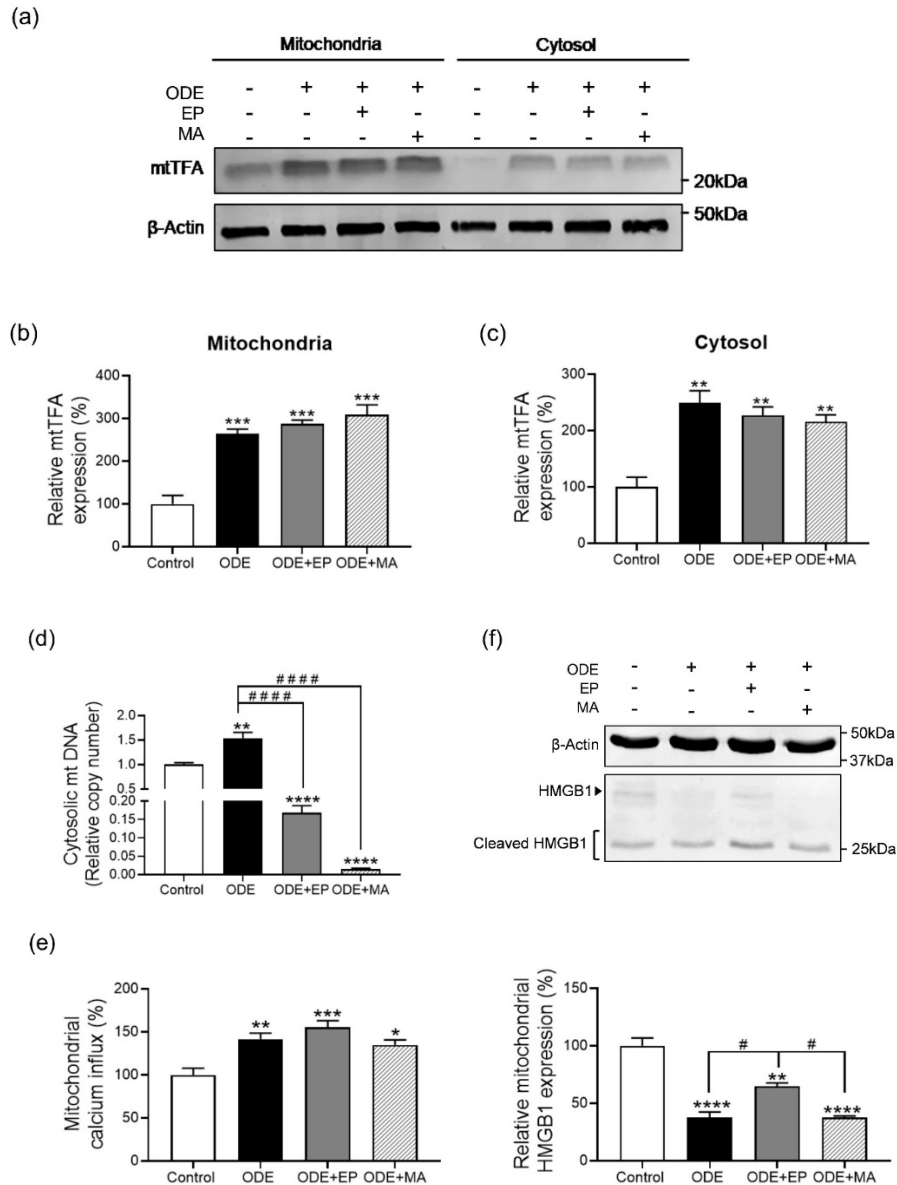

1066

1067

1068 **Figure 6. ODE exposure markedly increases secretion of mitochondrial DAMPs into the**  
 1069 **cytosol.** Immunoblotting of mitochondrial and mitochondria-free cytosolic fractions of THP1 cells,  
 1070 treated with ODE and antioxidant therapy for 24 hours, was performed to detect expression of  
 1071 mitochondrial transcription factor A (mtTFA). ODE (1%) treated cells increase mtTFA expression  
 1072 in the cytosol, while treatment with 10 μM of MA increased mtTFA in the mitochondrial matrix (a).  
 1073 Mitochondrial DNA leakage into the cytosol analyzed via qPCR was higher in the cytosol on ODE  
 1074 (1%) exposure which was decreased by 10 μM of MA (d). Intra-mitochondrial calcium levels  
 1075 measured by Rhod 2AM staining, showed increased calcium levels on ODE (1%) exposure, which  
 1076 remained unaffected by 10 μM of MA (e). Immunoblotting of mitochondrial fraction of THP1 cells

1077 was performed to measure mitochondrial HMGB1. ODE (1%) treatment showed a decrease in  
 1078 HMGB1, while EP treatment increased the HMGB1 compared to either ODE or MA (f). For all  
 1079 western blots, samples were derived from the same experiment and were processed in parallel.  
 1080 All protein bands were normalized over  $\beta$ -actin (37 kD) and percentage intensity relative to control  
 1081 analyzed. All data analyzed via one-way ANOVA with Tukey's multiple comparison test, # or \* $p$  <  
 1082 0.05, ## or \*\* $p$  < 0.01, ### or \*\*\* $p$  < 0.001, #### or \*\*\*\* $p$  < 0.001 and are represented as Mean  $\pm$  SEM  
 1083 with  $n = 3$ -6/treatment.

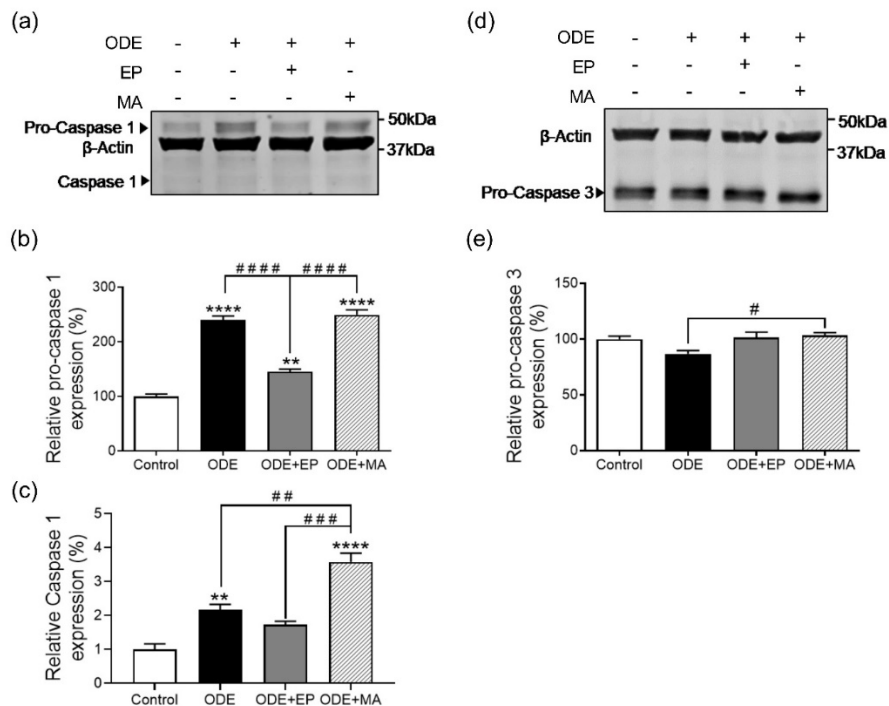

1084

1085 **Figure 7. ODE exposure increases expression of Caspase 1 consistent in inflammatory**  
 1086 **conditions.** Immunoblotting of whole cell lysates of THP1 cells, treated with ODE and antioxidant  
 1087 therapy for 24 hours, was performed to detect the expression of caspase 1 and 3. Cells treated  
 1088 with ODE (1%) and 10  $\mu$ M of MA increase in pro-caspase 1, along with the cleaved caspase 1  
 1089 p10, while co-treatment with 2.5  $\mu$ M of EP decreased expression comparable to control (a-c). No  
 1090 significant difference observed with pro-caspase 3 and absence of cleaved caspase 3 (d & e).  
 1091 For all western blots, samples were derived from the same experiment and were processed in  
 1092 parallel. All protein bands were normalized over  $\beta$ -actin (37 kD) and percentage intensity relative  
 1093 to control analyzed. All data analyzed via one-way ANOVA with Tukey's multiple comparison test,  
 1094 # or \* $p$  < 0.05, ## or \*\* $p$  < 0.01, ### or \*\*\* $p$  < 0.001, #### or \*\*\*\* $p$  < 0.001 and are represented as Mean  
 1095  $\pm$  SEM with  $n = 3$ /treatment.

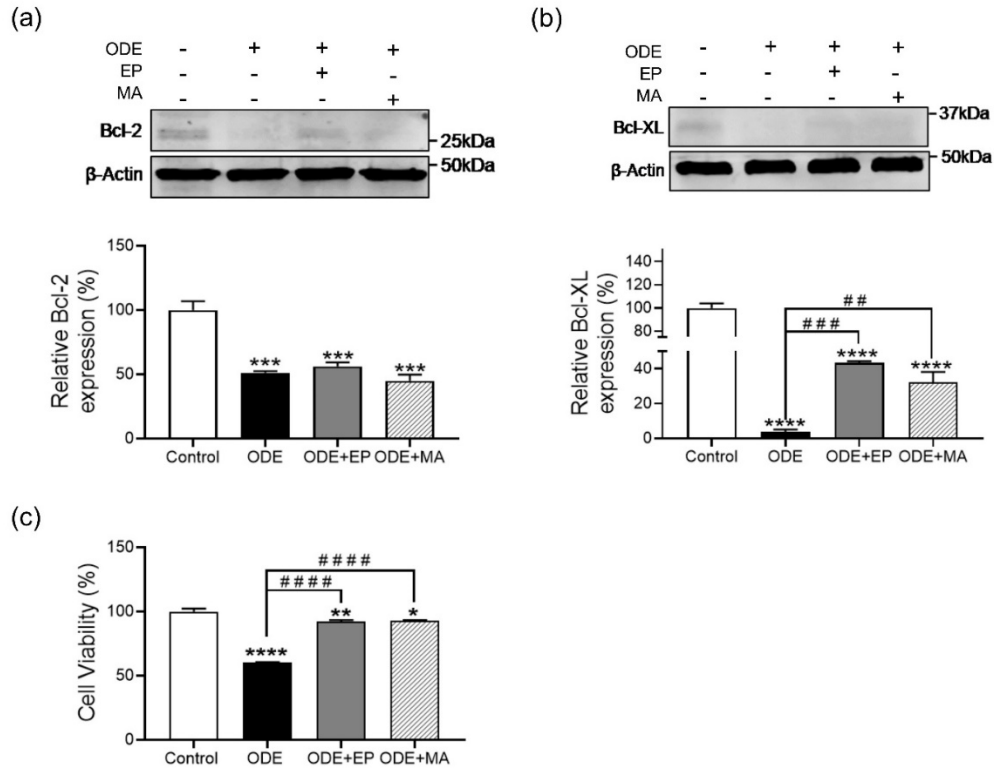

1096

1097 **Figure 8. Mitochondrial targeted antioxidant treatment has no effect Bcl-2 and Bcl-XL**  
 1098 **expression.** Immunoblotting of whole cell lysates of THP1 cells, treated with ODE and antioxidant  
 1099 therapy for 24 hours, was performed to observe expression of Bcl-2 and Bcl-XL. ODE (1%)  
 1100 treatment decreased Bcl-2 and Bcl-XL (a-c), while co-treatment with 10  $\mu$ M of MA increased Bcl-  
 1101 XL comparably higher than ODE (1%; b). MTT assay to measure cell viability showed increased  
 1102 viability on co-treatment with 2.5  $\mu$ M of EP or 10  $\mu$ M of MA compared to ODE (c). For all western  
 1103 blots, samples were derived from the same experiment and were processed in parallel. All protein  
 1104 bands were normalized over  $\beta$ -actin (37 kD) and percentage intensity relative to control analyzed.  
 1105 All data analyzed via one-way ANOVA with Tukey's multiple comparison test, # or \* $p$  < 0.05, ## or  
 1106 \*\* $p$  < 0.01, ### or \*\*\* $p$  < 0.001, #### or \*\*\*\* $p$  < 0.001 and are represented as Mean  $\pm$  SEM with  $n$  =  
 1107 3-6/treatment.
